# A computational screen for alternative genetic codes in over 250,000 genomes

Yekaterina Shulgina<sup>1</sup> and Sean R. Eddy<sup>1, 2, 3\*</sup>

\*For correspondence:

[seaneddy@fas.harvard.edu](mailto:seaneddy@fas.harvard.edu) (SRE)

<sup>1</sup>Department of Molecular and Cellular Biology, Harvard University, Cambridge, Massachusetts, USA; <sup>2</sup>Howard Hughes Medical Institute; <sup>3</sup>John A Paulson School of Engineering and Applied Sciences, Harvard University, Cambridge, Massachusetts, USA

**Abstract** The genetic code has been proposed to be a “frozen accident”, but the discovery of alternative genetic codes over the past four decades has shown that it can evolve to some degree. Since most examples were found anecdotally, it is difficult to draw general conclusions about the evolutionary trajectories of codon reassignment and why some codons are affected more frequently. To fill in the diversity of genetic codes, we developed Codetta, a computational method to predict the amino acid decoding of each codon from nucleotide sequence data. We surveyed the genetic code usage of over 250,000 bacterial and archaeal genome sequences in GenBank and discovered five new reassignments of arginine codons (AGG, CGA, and CGG), representing the first sense codon changes in bacteria. In a clade of uncultivated Bacilli, the reassignment of AGG to become the dominant methionine codon likely evolved by a change in the amino acid charging of an arginine tRNA. The reassignments of CGA and/or CGG were found in genomes with low GC content, an evolutionary force which likely helped drive these codons to low frequency and enable their reassignment.

## Introduction

The genetic code defines how mRNA sequences are decoded into proteins. The ancient origin of the standard genetic code is reflected in its near-universal usage, once proposed to be a “frozen accident” that is too integral to the translation of all proteins to change (*Crick, 1968*). However, the discovery of alternative genetic codes in over 30 different lineages of bacteria, eukaryotes, and mitochondria over the past four decades has made it clear that the genetic code is capable of evolving to some degree (*Knight et al., 2001a; Kollmar and Mühlhausen, 2017*).

The first alternative genetic codes were discovered by comparing newly sequenced genomes to amino acid sequences obtained by direct protein sequencing. Nonstandard codon translations were found this way in human mitochondria (*Barrell et al., 1979*), *Candida* yeasts (*Kawaguchi et al., 1989*), green algae (*Schneider et al., 1989*), and *Euplotes* ciliates (*Meyer et al., 1991*). Some reassignments of stop codons to amino acids were detected from DNA sequence alone, based on the appearance of in-frame stop codons in critical genes (*Yamao et al., 1985; Caron and Meyer, 1985; Cupples and Pearlman, 1986; Keeling and Doolittle, 1996; McCutcheon et al., 2009; Campbell et al., 2013; Záhonová et al., 2016*). As DNA sequence data has accumulated faster than direct protein sequences, computational methods have been developed to predict the genetic code from DNA sequence. The core principle of most methods is to align genomic coding regions to homologous sequences in other organisms (creating multiple sequence alignments) and then to

41 tally the most frequent amino acid aligned to each of the 64 codons. This approach led to the  
42 discovery of new genetic codes in screens of ciliates (*Swart et al., 2016; Heaphy et al., 2016*), yeasts  
43 (*Riley et al., 2016; Krassowski et al., 2018*), green algal mitochondria (*Noutahi et al., 2019; Žihala  
44 and Eliáš, 2019*) and stop codon reassignments in metagenomic data (*Ivanova et al., 2014*) and the  
45 development of software for specific phylogenetic groups (*Abascal et al., 2006b; Mühlhausen and  
46 Kollmar, 2014; Noutahi et al., 2017*). Some approaches, such as FACIL (*Dutilh et al., 2011*), have  
47 expanded phylogenetic breadth by using profile Hidden Markov model (HMM) representations of  
48 conserved proteins from phylogenetically diverse databases such as Pfam (*El-Gebali et al., 2019*).  
49 However, a systematic survey of genetic code usage across the tree of life has not yet been possible.  
50 Existing methods are generally either 1) phylogenetically restricted to clades where multiple se-  
51 quence alignments can be built for a predetermined set of proteins or 2) lacking sufficiently robust  
52 and objective statistical footing to enable a large-scale screen with high accuracy.

53 A potentially incomplete set of alternative genetic codes limits our ability to understand the  
54 evolutionary processes behind codon reassignment. One open question is why some codon reas-  
55 signments reappear independently. Reassignment of the stop codons UAA and UAG to glutamine is  
56 the most common change in eukaryotic nuclear genomes, appearing at least five independent times  
57 (*Schneider et al., 1989; Keeling and Doolittle, 1996; Keeling and Leander, 2003; Karpov et al., 2013;  
58 Swart et al., 2016*). In bacteria, all of the known changes reassign the stop codon UGA to either  
59 glycine in the Absconditabacteria and Gracilibacteria (*Campbell et al., 2013; Rinke et al., 2013*) or  
60 tryptophan in the Mycoplasmatales, Entomoplasmatales (*Bové, 1993*), and several insect endosym-  
61 biotic bacteria (*McCutcheon et al., 2009; McCutcheon and Moran, 2010; Bennett and Moran, 2013;  
62 Salem et al., 2017*). These recurring changes may reflect which codon reassignments are easier to  
63 evolve due to pre-existing constraints on tRNA anticodon-codon pairing, aminoacyl-tRNA synthetase  
64 recognition of cognate tRNAs, release factor binding, and other key steps in translation. However,  
65 without a complete picture of genetic code diversity, it is hard to disentangle patterns of codon  
66 reassignment from observation bias. For instance, in-frame stop codons caused by a stop codon  
67 reassignment may be more easily detectable than a subtle change in amino acid conservation  
68 indicative of a sense codon reassignment.

69 Another open question is how a new codon meaning can evolve without disrupting the transla-  
70 tion of most proteins. Reassigning a codon leads to the incorporation of the incorrect amino acid  
71 at all preexisting codon positions (*Crick, 1968*). Three evolutionary models differ in the pressure  
72 driving substitutions to remove the codon from positions that cannot tolerate the new translation.  
73 In the 'codon capture' model, the codon is first driven to near-extinction by pressures unrelated to  
74 reassignment, such as biased genomic GC content or genome reduction, which then minimizes  
75 the impact of reassignment on protein translation (*Osawa and Jukes, 1989*). This model was first  
76 proposed for the reassignment of the stop codon UGA to tryptophan in *Mycoplasma capricolum*,  
77 whose low genomic GC content (25% GC) in combination with small genome size (1 Mb) was thought  
78 to have driven the stop codon UGA to extremely low usage in favor of UAA and allowed 'capture' of  
79 UGA by a tryptophan tRNA (*Bové, 1993; Osawa and Jukes, 1989*). For larger nuclear genomes, other  
80 models have been proposed where codon usage changes occur concurrently with, and are driven  
81 by, changes in decoding capability. In the 'ambiguous intermediate' model, a codon is decoded  
82 stochastically as two different meanings in an intermediate step of codon reassignment, and this  
83 translational pressure induces codon substitutions at positions where ambiguity is deleterious  
84 (*Schultz and Yarus, 1994; Massey et al., 2003*). Extant examples of ambiguous translation support  
85 the plausibility of this model, such as yeasts that translate the codon CUG as both leucine and  
86 serine by stochastic tRNA charging (*Gomes et al., 2007*) or by competing tRNA species (*Mühlhausen  
87 et al., 2018*). Alternatively, the 'tRNA loss driven reassignment' model proposes an intermediate  
88 stage where a codon cannot be translated efficiently, perhaps due to tRNA gene loss or mutation,  
89 creating pressure for synonymous substitutions specifically away from that codon, allowing it to  
90 be captured later by a different tRNA (*Mühlhausen et al., 2016; Sengupta and Higgs, 2005*). These  
91 three models are not mutually exclusive and substitutions at the reassigned codon can occur due

92 to a combination of these pressures.

93 Here, we describe Codetta, a computational method for predicting the genetic code which can  
94 scale to analyze thousands of genomes. We perform the first survey of genetic code usage in all  
95 bacterial and archaeal genomes, reidentifying all known codes in the dataset and discovering the  
96 first examples of sense codon changes in bacteria. All five reassignments affect arginine codons  
97 (AGG, CGA, and CGG) and provide clues to help us understand how alternative genetic codes evolve.

## 98 Results

### 99 Codetta: a computational method to infer the genetic code

100 We developed Codetta, a computational method that takes DNA or RNA sequences from a single  
101 organism and predicts an amino acid translation for each of the 64 codons. The general idea is  
102 to align the input nucleotide sequence to probabilistic profiles of conserved protein domains in  
103 order to obtain, for each of the 64 codons, a set of profile positions aligned to that codon. Each  
104 profile position has twenty probabilities describing the expected amino acid. For each of the 64  
105 codons, we aggregate over the set of aligned profile positions to infer the single most likely amino  
106 acid decoding of the codon. Most previous approaches for genetic code prediction use the same  
107 basic idea (*Abascal et al., 2006b; Dutilh et al., 2011; Mühlhausen and Kollmar, 2014; Swart et al.,*  
108 *2016; Heaphy et al., 2016; Riley et al., 2016; Krassowski et al., 2018; Noutahi et al., 2019*), typically  
109 aligning the input sequence to multiple sequence alignments and using a simple rule to select the  
110 best amino acid for each codon.

111 With Codetta, we extend this idea to systematic high-throughput analysis by using a probabilistic  
112 modeling approach to infer codon decodings, and by taking advantage of the large collection  
113 of probabilistic profiles of conserved protein domains (profile HMMs) in the Pfam database (*El-*  
114 *Gebali et al., 2019*). Profile HMMs are built from multiple sequence alignments, and the emission  
115 probabilities at each consensus column are estimates of the expected amino acid frequencies. The  
116 Pfam database contains over 17,000 profile HMMs of conserved protein domains from all three  
117 domains of life, which are expected to align to about 50% of coding regions in a genome (*El-Gebali*  
118 *et al., 2019*). We align Pfam profile HMMs to a six-frame standard genetic code translation of  
119 the input DNA/RNA sequence using the HMMER `hmmscan` program (*Figure 1A*). Since we rely on a  
120 preliminary standard code translation, conserved protein domains could fail to align in organisms  
121 using radically different genetic codes. In the set of statistically significant `hmmscan` alignments  
122 (E-value <  $10^{-10}$ ), we make the simplifying approximation of considering each aligned consensus  
123 column independently, so the alignments are viewed as a set of pairwise associations between a  
124 codon  $Z$  (64 possibilities) and a consensus column of a Pfam domain profile (denoted  $C$ , an index  
125 identifying a Pfam consensus column).

126 From these data, we infer each of the 64 codons one at a time (*Figure 1B*). For a codon  $Z$  (e.g.  
127 UGA), the observed data  $\tilde{C}^Z$  are a set of  $N$  consensus columns  $C_i^Z$  ( $i = 1..N$ ) that associate to  $Z$  in  
128 the provisional alignments. We model the main data-generative process abstractly, imagining that  
129 each column  $C_i^Z$  was drawn from the pool of all possible consensus columns by codon  $Z$  which  
130 is translated as an unknown amino acid  $A$ . Each column has an affinity for codon  $Z$  proportional  
131 to the column's emission probability for the amino acid  $A$ ,  $P(A|C)$ . A consensus column strongly  
132 conserved for a particular amino acid  $A$  will tend to only associate with codons that translate  
133 to  $A$ ; moreover, consensus columns weakly conserved for  $A$  may also associate with probability  
134 proportional to their conservation for  $A$ . Thus this abstract matching process generates an observed  
135  $C_i^Z$  column association with the codon  $Z$  (translated as amino acid  $A$ ) with probability

$$P(C_i^Z|A) = \frac{P(A|C_i^Z)P(C_i^Z)}{P(A)}.$$

136 Here  $P(A|C_i^Z)$  is the emission probability for amino acid  $A$  at the Pfam consensus column  $C_i^Z$ .  
137  $P(A)$  is the average emission probability for amino acid  $A$  over the pool of all possible consensus

138 columns  $C$ , which we take to be all columns aligned to the target genome in order to better reflect  
139 genome-specific biases in amino acid usage.

140 Given the data  $\vec{C}^Z$  and this abstract generative model, we infer the most likely decoding  $M$  for  
141 codon  $Z$  out of 21 possibilities  $M \in \{\text{Ala, Cys, ..., Tyr, ?}\}$  (**Figure 1B**). The  $M = ?$  model of non-specific  
142 translation draws columns randomly and serves to catch codons that do not encode a specific  
143 amino acid, such as stop codons and ambiguously translated codons. For a given decoding  $M$ , the  
144 probability of the observed columns  $\vec{C}^Z$  is then:

$$P(\vec{C}^Z|M) = \begin{cases} \prod_{i=1}^N \frac{P(A=M|C_i^Z)P(C_i^Z)}{P(A=M)} & \text{if } M \in \{\text{Ala, Cys, ..., Tyr}\} \\ \prod_{i=1}^N P(C_i^Z) & \text{if } M = ? \end{cases}$$

145 Setting the prior probability of each decoding,  $P(M)$ , to be uniform, we compute the probability  
146 of the decoding  $M$  as:

$$P(M|\vec{C}^Z) = \frac{P(\vec{C}^Z|M)}{\sum_{M'} P(\vec{C}^Z|M')}$$

147 We assign an amino acid translation to a codon if it attains a decoding probability above some  
148 threshold (typically 0.9999). We assign a '?' if no amino acid decoding satisfies the probability  
149 threshold (including the case where '?' itself has high probability). A '?' assignment tends to happen  
150 if the codon is rare, with few aligned Pfam consensus columns on which to base the inference, or if  
151 the codon is ambiguously translated such that no single amino acid model reaches high probability.  
152 Because we do not model stop codons explicitly, we expect '?' to be the inferred meaning since stop  
153 codons ideally would have few or no aligned Pfam consensus columns.

154 To assess how many columns in  $\vec{C}^Z$  are needed for reliable codon assignment, we constructed  
155 synthetic  $\vec{C}^Z$  datasets ranging from 2 to 500 consensus columns by subsampling the consensus  
156 columns aligned to each of the 61 sense codons in the *Escherichia coli* genome. We calculated the  
157 per-codon error rate (fraction of samples predicting the incorrect amino acid) and the per-codon  
158 power (fraction of samples predicting the correct amino acid) using a probability threshold of 0.9999.  
159 Lack of an amino acid inference (?) contributed to neither. Per-codon error rates were < 0.00005  
160 for all sizes of  $\vec{C}^Z$  and we found that about 20 aligned consensus columns in  $\vec{C}^Z$  suffice for >95%  
161 power. Accuracy may differ in real genomes for various biological reasons, but these results gave  
162 us confidence to proceed.

## 163 Genetic code prediction of 462 yeast species confirms known distributions of CUG 164 reassignment

165 We further validated Codetta on the budding yeasts (Saccharomycetes, 462 sequenced species)  
166 which vary in their translation of CUG as either serine, leucine, or alanine depending on the species  
167 (**Mühlhausen et al., 2016; Krassowski et al., 2018; Mühlhausen et al., 2018**). In some CUG-Ser  
168 clade species, such as *Candida albicans*, CUG codons are stochastically decoded as a mix of serine  
169 (97%) and leucine (3%) because the CUG-decoding tRNA<sub>CAG</sub> is aminoacylated by both the seryl- and  
170 leucyl-tRNA synthetases (**Suzuki et al., 1997; Gomes et al., 2007**). Codetta is not designed to predict  
171 ambiguous decoding and is expected to assign either the dominant amino acid or a '?' in cases like  
172 *C. albicans*.

173 For 453 species, the predicted CUG translation was consistent with the known phylogenetic  
174 distribution of CUG reassignments (**Figure 2A**). This includes *C. albicans*, which was predicted to use  
175 the predominant serine translation (**Gomes et al., 2007**). For the remaining nine species, Codetta  
176 did not put a high probability on any amino acid decoding of CUG (inferred meaning of '?'). Two of  
177 these species– *Babjeviella inositovora* and *Cephaloscyus fragrans*– are basal members of the CUG-Ser  
178 clade. Both of these genomes contain a CUG-decoding tRNA<sub>CAG</sub> gene with features of serine identity



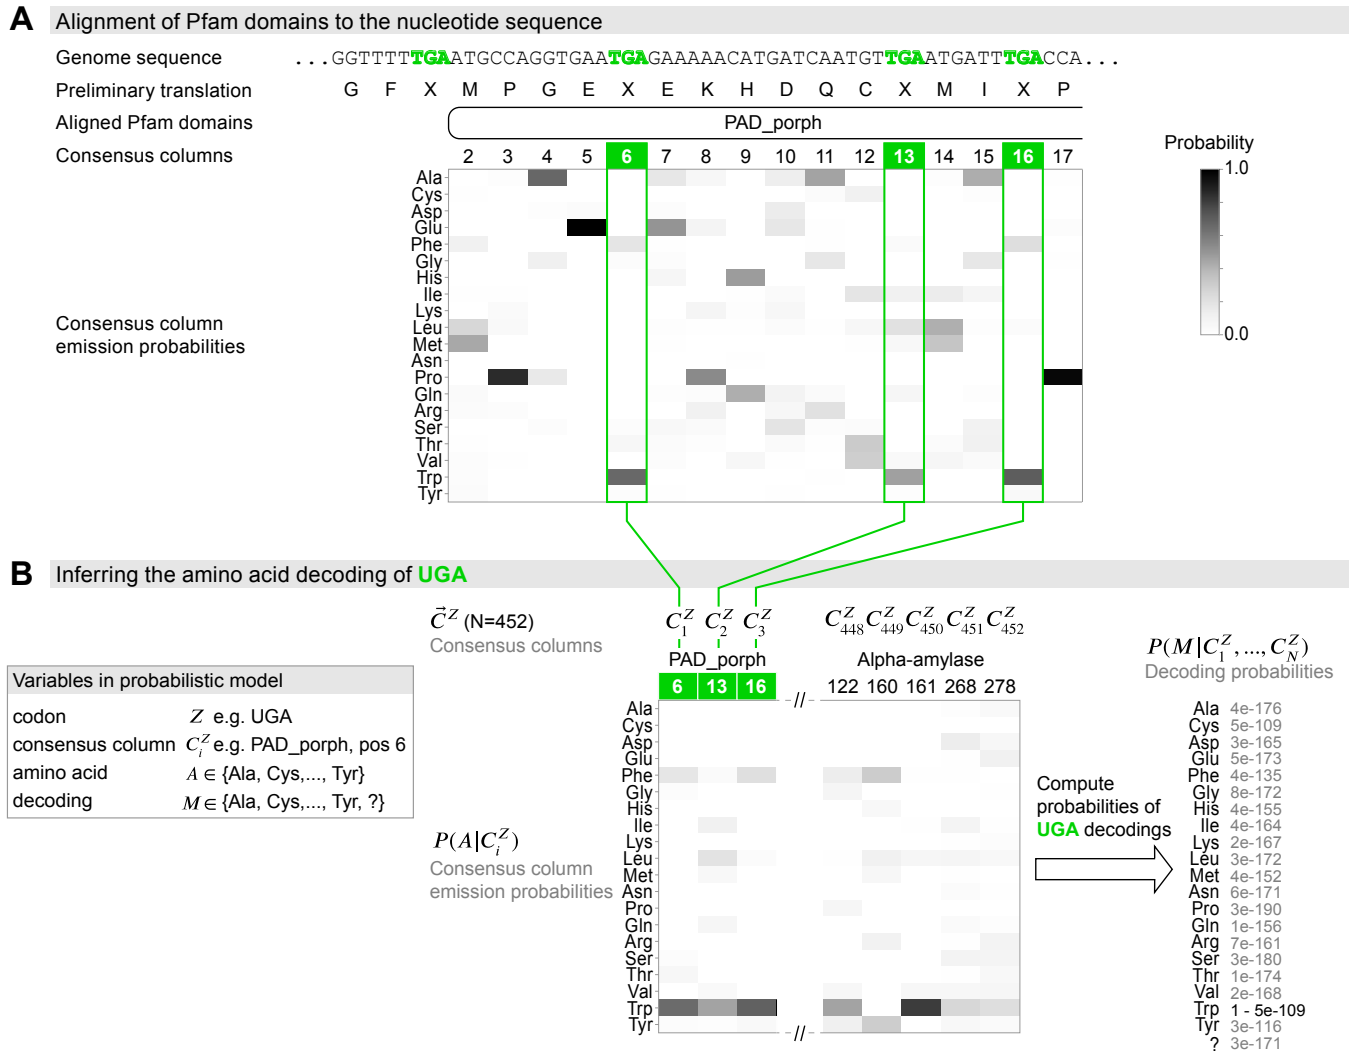

**Figure 1.** Schematic of the genetic code inference method implemented in Codetta. (A) A fragment of the *Mycoplasma capricolum* genome is used to demonstrate alignment of a Pfam domain (PAD\_porph) to a preliminary standard code translation of the input DNA sequence (one of six frames shown). All canonical stop codons, including UGA (TGA in genome sequence, reassigned to tryptophan in *M. capricolum*), are translated as 'X' in the preliminary standard code translation which `hmmscan` (program used to align Pfam domains) treats as an unknown amino acid. Each consensus column in the PAD\_porph domain has a characteristic emission probability for each of the twenty canonical amino acids, represented by a heatmap. (B) Pfam consensus columns aligning to UGA codons across the entire genome comprise the  $\vec{C}^Z$  set for UGA ( $N=452$  Pfam consensus columns). The Pfam emission probabilities  $P(A|C_i^Z)$  for all 452 aligned consensus columns are used to compute the decoding probabilities  $P(M|\vec{C}^Z)$ . The most likely amino acid translation of UGA is inferred to be tryptophan, with decoding probability greater than the cutoff of 0.9999.

179 (see Methods) and *B. inositovora* has previously been shown to translate CUG codons primarily as  
180 serine by whole proteome mass spectrometry (*Krassowski et al., 2018; Mühlhausen et al., 2018*),  
181 suggesting that CUG is decoded as serine in these species. Codetta did not infer an amino acid for  
182 CUG because the aligned Pfam consensus columns were not consistently conserved for a single  
183 amino acid (**Figure 2-Figure Supplement 1**).

184 The other seven species without an inferred amino acid for CUG all belong to the closely-related  
185 genera *Ascoidea* and *Saccharomycopsis* (four additional species in these clades were predicted  
186 to translate CUG as serine). Analysis of tRNA genes revealed that 9 out of 11 species in this  
187 clade encode two types of tRNA<sub>CAG</sub> genes, one predicted to be serine-type and one leucine-type,  
188 suggesting that CUG may be ambiguously translated as both serine and leucine via competing  
189 tRNAs in some of these species (**Figure 2B**). We used Northern blotting to assay the expression  
190 of both tRNA<sub>CAG</sub> genes in some of these species under a variety of growth conditions (data not  
191 shown), but could detect reliable expression of both serine- and leucine-type tRNA<sub>CAG</sub> genes only in  
192 *Saccharomycopsis malanga* (only the serine tRNA<sub>CAG</sub> could be detected in other species) (**Figure 2C**).  
193 To determine whether both tRNAs are aminoacylated, we performed acid urea PAGE Northern  
194 blotting which separates aminoacylated and deacylated tRNAs. We found that both serine and  
195 leucine *S. malanga* tRNA<sub>CAG</sub> are predominantly charged in cells (**Figure 2C**), likely partaking in the  
196 translation of CUG codons. If CUG is indeed translated ambiguously in this clade, it would explain  
197 why Codetta did not place a high probability on any single amino acid decoding for some species.

198 The existence of serine and leucine tRNA<sub>CAG</sub> genes in some *Ascoidea* and *Saccharomycopsis* yeasts  
199 was reported by *Krassowski et al. (2018)* and *Mühlhausen et al. (2018)* while we were conducting  
200 experiments. Ambiguous translation of CUG was demonstrated in *A. asiatica* (*Mühlhausen et al.,*  
201 *2018*); however, for *S. malanga* only expression of the serine tRNA<sub>CAG</sub> could be detected (*Krassowski*  
202 *et al., 2018*) and incorporation of predominantly serine at protein positions encoded by CUG  
203 (*Mühlhausen et al., 2018*). In contrast to these studies, we used a saturated growth condition where  
204 the leucine tRNA<sub>CAG</sub> seems to be more highly expressed. While we did not quantify the relative  
205 expression of the two tRNA<sub>CAG</sub> in *S. malanga*, a visual comparison of the band intensities in **Figure 2C**  
206 suggests that the expression of the leucine tRNA<sub>CAG</sub> is at least ten times less than the serine tRNA<sub>CAG</sub>  
207 even in the saturated growth condition.

208 These results show that Codetta can correctly infer canonical and non-canonical codon trans-  
209 lations and can flag unusual situations such as ambiguous translation even though it assumes  
210 unambiguous translation. All of the remaining 63 codons were inferred to use the expected  
211 translation in all species, with the following exceptions. In three species belonging to a lineage  
212 of *Hanseniaspora* with low genomic GC content (*Steenwyk et al., 2019*), the arginine codons CGC  
213 and/or CGG had a '?' inference due to few (<20) aligned Pfam consensus columns. In eight other  
214 species, either the stop codon UAG or UGA was inferred to code for tryptophan due to some (<23)  
215 aligned Pfam consensus columns. We could not find any nuclear suppressor tRNA genes, and we  
216 believe these inferences are due to the erroneous alignment of Pfam domains to in-frame stop  
217 codons in pseudogenes. In-frame stop codons do not appear randomly within pseudogenes but  
218 instead are most likely to result from single nucleotide transversions from certain codons (such as  
219 the UGG tryptophan codon).

## 220 **Computational screen of all bacterial and archaeal genomes finds previously known** 221 **alternative genetic codes**

222 To explore the diversity of genetic codes in bacterial and archaeal genomes, we used Codetta  
223 to analyze 251,571 assembled genomes from GenBank, including partial assemblies and those  
224 derived from single-cell genomics and metagenomic assembly. Summaries of our analysis (**Table 1**  
225 and **Table 2**) are shown for a subset of the results, dereplicated to reduce the over-representation  
226 of frequently sequenced organisms by selecting a single assembly for each species-level NCBI  
227 taxonomic ID (48,693 unique species: 46,384 bacteria, 2,309 archaea). Results for the full dataset  
228 and the dereplicated subset are available in **Table 2**-source data 1.

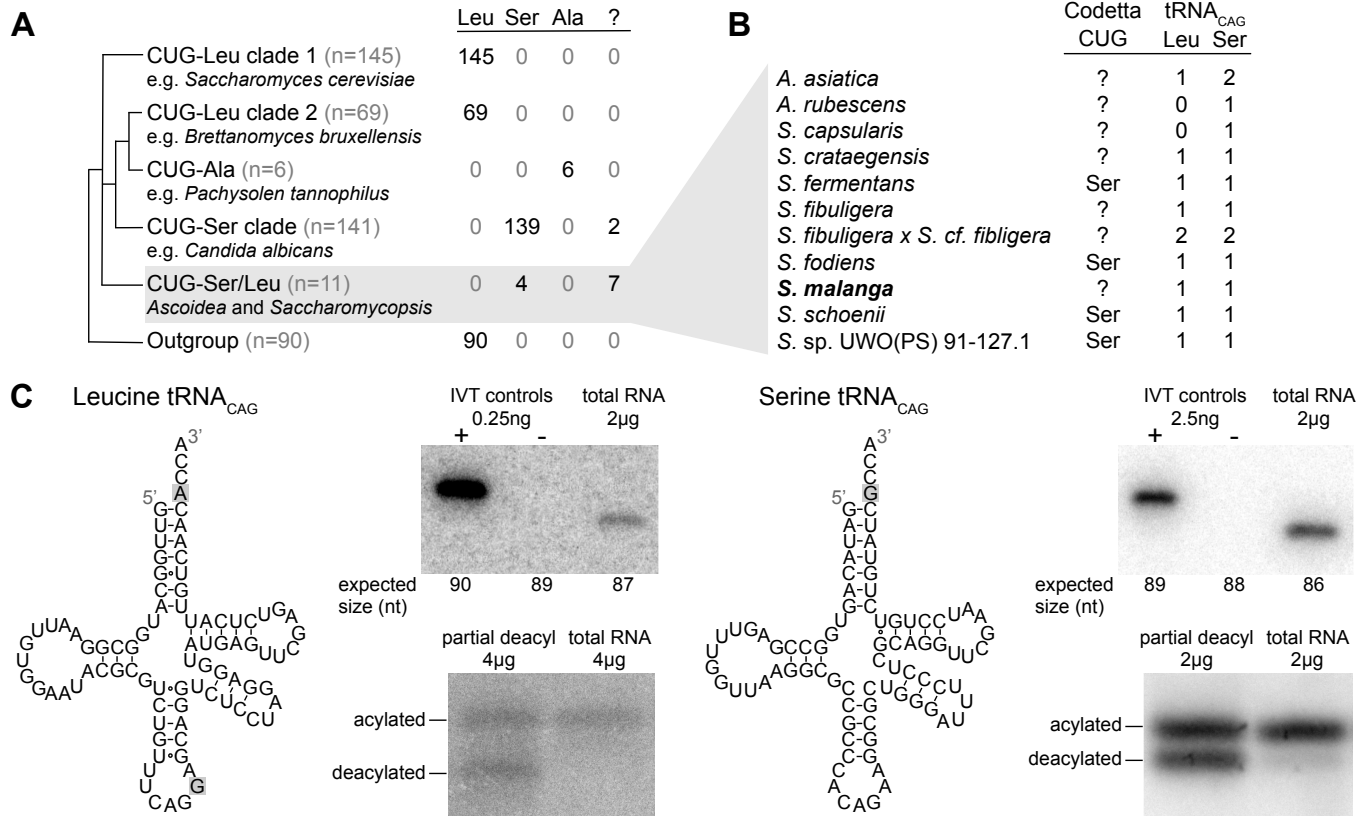

**Figure 2.** (A) CUG translation inferred by Codetta of 462 *Saccharomycetes* species, grouped by phylogenetic clade. Cladogram was adapted from *Shen et al. (2018)*. Phylogenetic placement of CUG-Leu/Ser clade is unresolved, thus the three-way branch. (B) Codetta CUG inference and number of tRNA<sub>CAG</sub> genes in *Ascoidea* and *Saccharomycopsis* genomes. tRNA<sub>CAG</sub> genes were identified using tRNAscan-SE 2.0 and were classified as being serine-type or leucine-type based on the presence of tRNA identity elements. (C) Northern blotting to confirm expression and charging of leucine and serine tRNA<sub>CAG</sub> genes in *S. malanga*. Probable secondary structures of the two *S. malanga* tRNA<sub>CAG</sub> are shown with features used for leucine/serine classification highlighted in gray. In the tRNA expression blots, *in vitro* transcribed (IVT) versions of the target tRNA (+ control) and the most similar other tRNA (- control, as determined by sequence homology with the probe) were used as controls for probe specificity. In the tRNA charging blots, a partial deacylation control was used to help visualize the expected band sizes for acylated and deacylated versions of the probed tRNA.

**Figure 2-Figure supplement 1.** Distribution of Pfam consensus column amino acid support for CUG codons in *B. inositovora* and *C. fragrans*.

**Figure 2-source data 1.** Table of all analyzed yeast genomes with phylogenetic grouping and Codetta CUG inference.

| Phylogenetic distribution           | NCBI taxids          | Ref    | N species | Codon reassignment | Reassigned codon    |                |
|-------------------------------------|----------------------|--------|-----------|--------------------|---------------------|----------------|
|                                     |                      |        |           |                    | Expected amino acid | Uninferred (?) |
| Entomoplasmatales & Mycoplasmatales | 186328, 264638, 2085 | [1, 2] | 199       | UGA Stop→W         | 191                 | 8              |
| <i>Hodgkinia cicadicola</i>         | 573658               | [3]    | 1         | UGA Stop→W         | 1                   | 0              |
| <i>Nasuia deltocephalinicola</i>    | 1160784              | [4]    | 1         | UGA Stop→W         | 1                   | 0              |
| <i>Zinderia insecticola</i>         | 884215               | [5]    | 1         | UGA Stop→W         | 1                   | 0              |
| <i>Stammera capleta</i>             | 2608262              | [6]    | 1         | UGA Stop→W         | 1                   | 0              |
| Gracilibacteria                     | 363464               | [7]    | 15        | UGA Stop→G         | 13                  | 2              |
| Absconditabacteria                  | 221235               | [8]    | 6         | UGA Stop→G         | 6                   | 0              |

**Table 1.** A summary of all bacterial clades previously known to use a codon reassignment. For each clade, the NCBI taxonomic IDs (taxids) shown most closely correspond to the known phylogenetic distribution from the literature. For each codon reassignment, we show the number of sequenced species analyzed by Codetta and how many were inferred to use the expected amino acid or had no inferred amino acid. None of the analyzed species belonging to reassigned clades were predicted to use an unexpected amino acid at the reassigned codon. [1] *Bové (1993)*, [2] *Volokhov et al. (2007)*, [3] *McCutcheon et al. (2009)*, [4] *Bennett and Moran (2013)*, [5] *McCutcheon and Moran (2010)*, [6] *Salem et al. (2017)*, [7] *Rinke et al. (2013)*, [8] *Campbell et al. (2013)*

229 To see if our screen recovered known alternative genetic codes, we collated a comprehensive  
 230 literature summary of all bacterial and archaeal clades known to use alternative genetic codes  
 231 (**Table 1**) and layered it over the NCBI taxonomy, annotating all remaining organisms with the  
 232 standard genetic code. This resulted in a genetic code annotation for each species. For most  
 233 species using known alternative genetic codes in our dataset, our predictions at the reassigned  
 234 codon agreed with the the expected amino acid translation (**Table 1**). There were no instances of  
 235 reassigned codons predicted to translate as an unexpected amino acid, but there were a few cases  
 236 of reassigned UGA codons which had no amino acid meaning inferred ('?' inference).

237 Since the uninferred codons could represent a lack of sensitivity by Codetta, we looked more  
 238 closely at these examples. In the Mycoplasmatales and Entomoplasmatales, which are believed  
 239 to translate the canonical stop codon UGA as tryptophan, eight species had no inferred amino  
 240 acid meaning for UGA due to fewer than 4 aligned Pfam consensus columns. All of these genomes  
 241 lack a UGA-decoding tRNA<sup>Trp</sup><sub>UCA</sub> gene and all but one instead contain a release factor 2 gene (which  
 242 terminates translation at UGA). Five of these species are included in the Genome Taxonomy  
 243 Database (GTDB) (*Parks et al., 2020*), a comprehensive phylogeny of over 190,000 bacterial and  
 244 archaeal genomes, where they are grouped into a different order (GTDB order RF39). We therefore  
 245 attribute at least 5 (and perhaps all 8) as a taxonomic misannotation in the NCBI database, and  
 246 we believe that UGA is a stop codon in these species. In the Gracilibacteria, which are believed to  
 247 translate the stop codon UGA as glycine, two species had no inferred amino acid meaning for UGA.  
 248 Neither genome contained the expected UGA-decoding tRNA<sup>Gly</sup><sub>UCA</sub> gene and both instead encoded a  
 249 release factor 2 gene, supporting that UGA is a stop codon and not a glycine codon in these species.  
 250 Indeed, one of these species is included in the GTDB and is grouped in a different order than the  
 251 other UGA-reassigned Gracilibacteria and Absconditabacteria.

252 Across the 48,693 genomes (dereplicated to one assembly per species), we predicted the amino  
 253 acid translation of a total of 2,970,497 individual sense codons (roughly 61 times the number  
 254 of genomes), with 99.79% of the predictions consistent with the expected amino acid (similar  
 255 proportion across bacteria and archaea) (**Table 2**). About 0.19% of sense codons had a '?' inference,  
 256 demonstrating that entire genomes contain more than enough information to infer the amino acid  
 257 translation of most sense codons. Unexpected amino acid meanings were predicted for 612 sense  
 258 codons. These are candidates for new codon reassignments, but could also include inference errors.  
 259 For stop codons, 99.80% out of total of 145,855 stop codons across the dereplicated bacterial and

|       |                              | Bacteria       |        | Archaea       |        |
|-------|------------------------------|----------------|--------|---------------|--------|
|       |                              | 46,384 species |        | 2,309 species |        |
| Sense | Total (N codons x N species) | 2,829,648      |        | 140,849       |        |
|       | Expected amino acid          | 2,823,497      | 99.78% | 140,631       | 99.85% |
|       | Other amino acid             | 612            | 0.02%  | 0             | 0.00%  |
|       | Uninferred (?)               | 5,539          | 0.20%  | 218           | 0.15%  |
| Stop  | Total (N codons x N species) | 138,928        |        | 6,927         |        |
|       | Amino acid                   | 290            | 0.21%  | 9             | 0.13%  |
|       | Uninferred (?)               | 138,638        | 99.79% | 6,918         | 99.87% |

**Table 2.** A summary of codon inferences from the set of genomes analyzed by Codetta, dereplicated to one assembly per species. The Codetta inference for each codon is compared against a genetic code annotation derived by layering the known bacterial genetic codes in **Table 1** over the NCBI taxonomy. Reassigned stop codons are included with sense codons.

**Table 2-source data 1.** Table of all analyzed genome assemblies with genetic code inferred by Codetta, inclusion in the dereplicated dataset, and number of expected, unexpected, and '?' codon inferences.

260 archaeal genomes had no inferred amino acid meaning, as expected. 290 bacterial stop codons and  
 261 9 archaeal stop codons were inferred to translate as an amino acid, adding to our list of candidate  
 262 new genetic codes.

### 263 Validation of candidate new alternative genetic codes

264 To prioritize high-confidence novel genetic codes, we gathered additional evidence by examining 1)  
 265 the translational components (tRNA and/or release factor genes) involved in the reassignment, 2) the  
 266 usage of the reassigned codon, including manual examination of alignments of highly conserved  
 267 single-copy genes, and 3) the phylogenetic extent of the proposed reassignment. Since many  
 268 candidate genetic codes were found in uncultivated clades with only rough taxonomic classification  
 269 on NCBI, we explored phylogenetic relationships using the Genome Taxonomy Database (GTDB)  
 270 (*Parks et al., 2020*). The GTDB is a phylogeny of over 190,000 archaeal and bacterial genomes,  
 271 providing provisional domain-to-species phylogenetic classifications for uncultivated as well as  
 272 established clades. A list of all candidate novel genetic codes can be found in Supplementary file 1.  
 273 We focused on the candidate codon reassignments with the highest degree of additional evidence  
 274 and attempted to characterize common sources of error. The set of lower-confidence candidates  
 275 may still include additional real codon reassignments requiring further validation.

276 The most common error was the inference of AGA and/or AGG arginine codons as coding  
 277 for lysine, occurring in 567 bacterial species. Almost all of the AGA- and AGG-decoding tRNAs  
 278 found in these genomes were consistent with arginine identity (based on the arginine identity  
 279 elements A/G73 and A20), supporting that AGA and AGG are arginine codons in the majority of  
 280 these species. The unusually high GC content of these genomes (ranging between 0.52 - 0.77,  
 281 median 0.68) suggests that the source of the lysine inference comes from high GC content-driven  
 282 nonsynonymous substitutions of the AAA and AAG lysine codons to AGA and AGG arginine codons  
 283 at protein residues that can tolerate either positively-charged amino acid. As a result, AGA and  
 284 AGG codons consistently appear at residues conserved for lysine in other species, which Codetta  
 285 mistakes for the signature of codon reassignment. Bacteria with high genomic GC content have  
 286 long been observed to preferentially use more arginine and less lysine in cellular proteins (*Sueoka,*  
 287 *1961*), most likely due to substitutions between the aforementioned lysine and arginine codons  
 288 (*Singer and Hickey, 2000; Knight et al., 2001b*). This error could be mitigated in future analyses by  
 289 using profile HMMs built from sequences that match the analyzed genome in GC content or amino  
 290 acid composition.

291 Some erroneous stop codon inferences resulted from genome contamination by organisms  
 292 with known stop codon reassignments. We suspected contamination when the Pfam consensus  
 293 columns aligned to a stop codon were only present in a limited part of the genome and confirmed



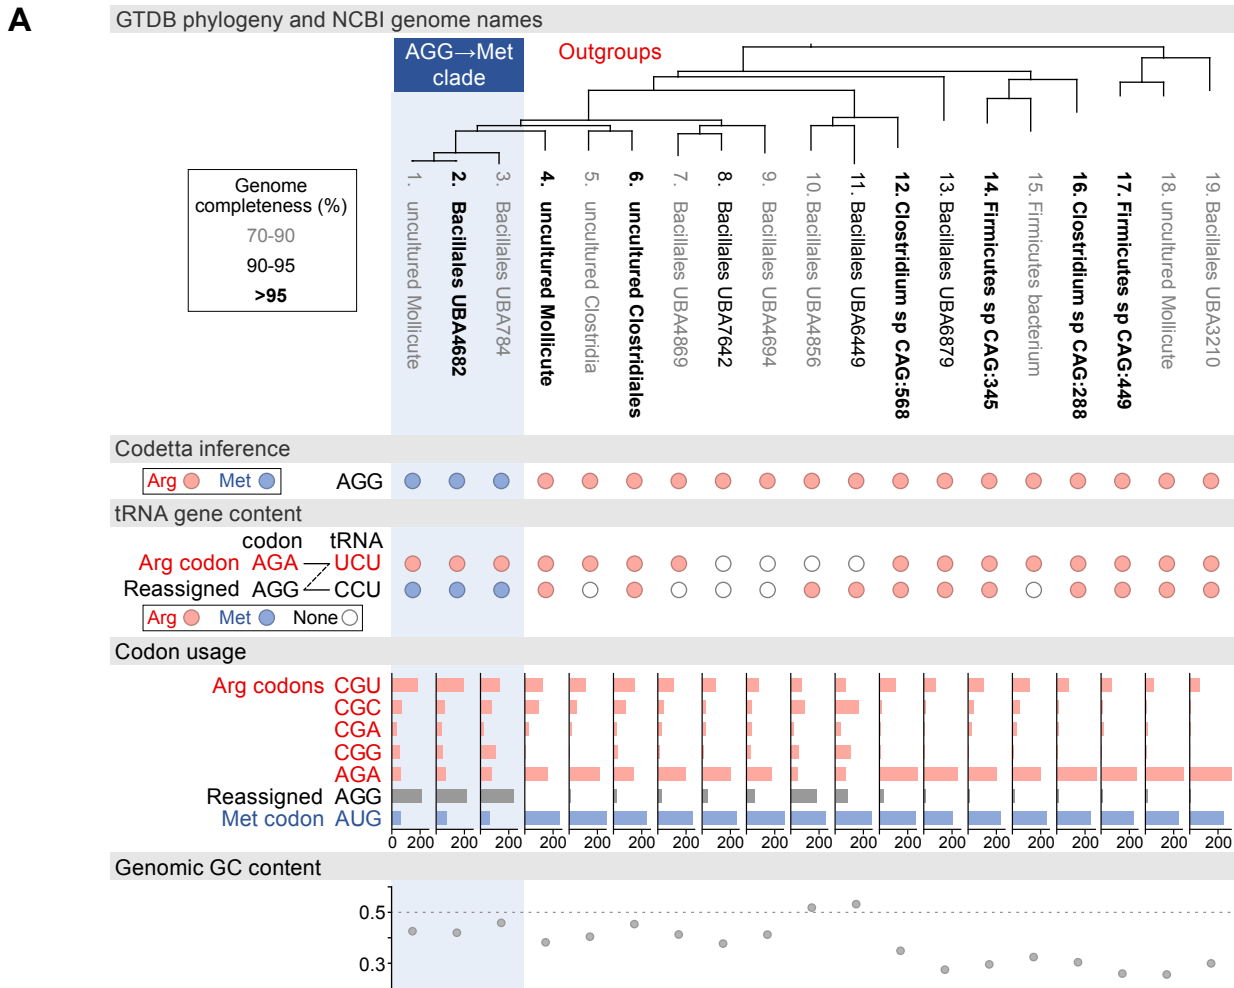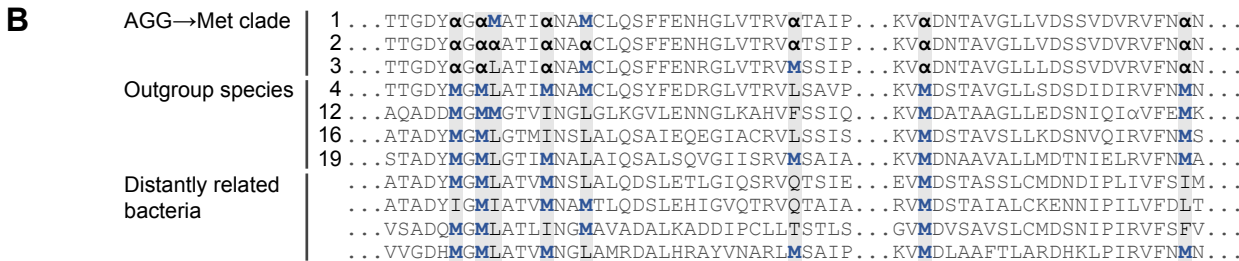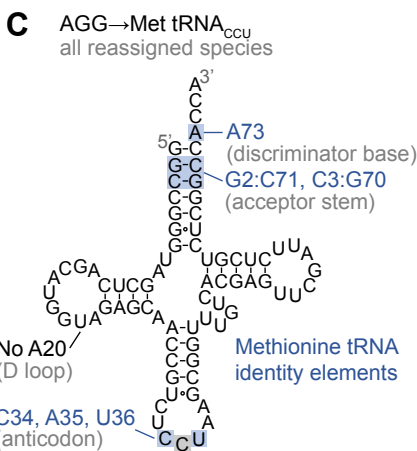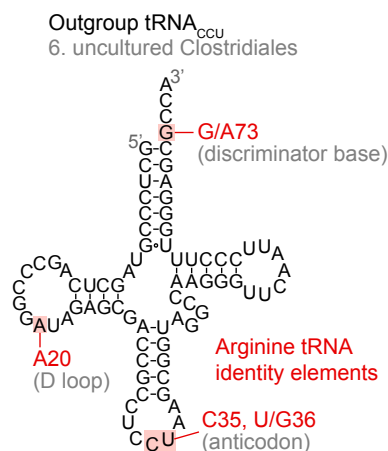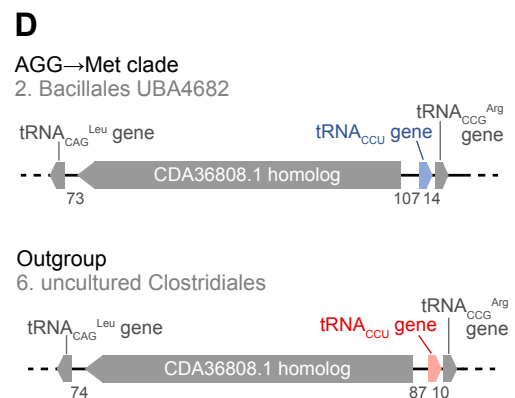

**Figure 3.** Reassignment of AGG from arginine to methionine in a clade of uncultivated Bacilli. (A) GTDB phylogenetic tree of the Bacilli AGG→Met clade and closest outgroup genomes, with the annotated NCBI genome name shaded according to the GTDB CheckM estimated genome completeness. GTDB genus UBA7642 corresponds to species #1-9 and GTDB family CAG-288 corresponds to species #1-16. For each genome, the Codetta AGG inference is indicated by colored circles (red: arginine, blue: methionine). The presence of tRNA genes is also indicated by filled circles for tRNA<sub>UCU</sub> and tRNA<sub>CCU</sub>, colored by the predicted amino acid charging based on known identity elements (see Methods), or a white circle if no tRNA gene could be detected. The lines connecting codons and anticodons represent the likely wobble decoding capabilities, with dashed lines representing likely weaker interactions. Codon usage is the frequency per 10,000 codons aligned to Pfam domains. (B) Multiple sequence alignment of uridylylate kinase (BUSCO POG091H02JZ) from the reassigned species, selected outgroup species, and four more distantly related bacteria (*Bacillus subtilis*, *Nostoc punctiforme*, *Chlamydia caviae*, and *E. coli*). All AGGs are represented by  $\alpha$ . Alignment regions containing multiple nearby AGG positions in the reassigned species are shown. (C) A comparison of the AGG-decoding tRNA<sub>CCU</sub> in the Bacilli AGG → Met clade (identical sequence in all genomes) and in an outgroup genome (#6, uncultured Clostridiales). tRNA sequence features involved in methionine identity in the reassigned clade tRNA<sub>CCU</sub> and arginine identity in the outgroup tRNA are highlighted (Meinzel et al., 1993; Giegé et al., 1998), with nucleotide numbering following the convention of Sprinzl et al. (1998). The C35 anticodon nucleotide in the AGG→Met clade tRNA is highlighted in gray because it does not match the A35 methionine identity element. (D) The genomic context surrounding the tRNA<sub>CCU</sub> gene in a member of the Bacilli AGG→Met clade (#2, Bacillales UBA4682) and in an outgroup species (#6, uncultured Clostridiales). Gene lengths and intergenic distances are drawn proportionally, with the number of base pairs between each gene indicated below.

**Figure 3–source data 1.** Table of genome accessions, Codetta AGG inference, tRNA gene presence, codon usage, and genome GC content for the reassigned AGG→Met Bacilli and outgroup species shown on tree.

294 the origin of these regions by homology search of the genes containing the in-frame stop codons.  
295 We have found examples of predicted stop reassignments in *Sulfolobus* assemblies caused by  
296 contamination with UGA-recoding *Mycoplasma* contigs, in an alphaproteobacteria assembly caused  
297 by contamination with UAA- and UAG-recoding ciliate contigs, in *Chloroflexi* assemblies caused by  
298 contamination with UGA-recoding Absconditabacteria contigs, and in others.

299 We found five clades using candidate novel alternative genetic codes with a convincing level  
300 of additional support, including tRNA genes that would enable the new translation. All five new  
301 genetic codes involve the reassignment of arginine codons, representing the first sense codon  
302 reassignments in bacteria.

### 303 **Reassignment of the canonical arginine codon AGG to methionine in a clade of** 304 **uncultivated Bacilli**

305 Eight bacterial genomes were inferred to translate AGG, a canonical arginine codon, as methionine.  
306 All eight genomes were assembled from fecal metagenomes of baboons or humans (Parks et al.,  
307 2017; Almeida et al., 2019) and have only coarse-grained NCBI genome classification as uncultured  
308 Bacillales or Mollicutes bacteria. The GTDB assigns these eight genomes to a three species clade  
309 within the placeholder genus UBA7642 (family CAG-288, order RFN20, class Bacilli), of which all  
310 other species were inferred to translate AGG as arginine (Figure 3A).

311 In each of the reassigned genomes, the AGG inference by Codetta is based on a sufficiently large  
312 number of aligned Pfam consensus columns (over 2,200 compared to an average of about 1,800  
313 for each of the other 60 sense codons) from over 480 different Pfam domains. Figure 3B shows an  
314 example multiple sequence alignment of uridylylate kinase, a single-copy conserved bacterial gene,  
315 from the reassigned species, outgroup genomes, and several more distantly related bacteria. In the  
316 reassigned clade, AGG codons are used interchangeably with AUG methionine codons and tend to  
317 occur at positions conserved for methionine and other nonpolar amino acids in the other species.

318 In the reassigned clade, AGG is the dominant methionine codon with a usage of 209-235 per  
319 10,000 codons in Pfam alignments, outnumbering the canonical methionine codon AUG (59-69  
320 per 10,000 codons) (Figure 3A). The process of codon reassignment involves genome-wide codon  
321 substitutions to remove the reassigned codon from positions that cannot tolerate the new amino  
322 acid, leading to depressed codon usage. High usage of AGG in the reassigned clade suggests that

323 this is an established codon reassignment that has had time to rebound in frequency through  
324 synonymous substitutions with the standard AUG methionine codon. In many outgroup genomes,  
325 AGG is a rare arginine codon (**Figure 3A**).

326 Escape from viral infection has been put forth as a potential selective pressure for the evolution  
327 of alternative genetic codes, although viruses are also known to infect some alternative genetic  
328 code organisms such as *Mycoplasma* and mitochondria (**Shackelton and Holmes, 2008**). We inferred  
329 the genetic code of phage genomes assembled by *Al-Shayeb et al. (2020)* from the same baboon  
330 fecal metagenomic dataset as some reassigned Bacilli genomes. Two phage assemblies were  
331 predicted to translate AGG as methionine (assemblies GCA\_902730795.1 and GCA\_902730815.1).  
332 The assemblies do not contain genes for the AGG-decoding tRNA<sub>CCU</sub>, so the phage presumably rely  
333 on the host tRNAs for translation. Thus, some phage may have adapted to the AGG translation as  
334 methionine in the reassigned Bacilli.

335 We used tRNAscan-SE 2.0 (**Chan et al., 2019**) to determine which tRNAs are available to de-  
336 code AGG in the reassigned and outgroup genomes (**Figure 3A**). Some tRNA genes are missing,  
337 possibly due to the incomplete nature of some metagenome-assembled genomes as indicated by  
338 low genome completeness estimates. The cognate tRNA for the AGG codon, tRNA<sub>CCU</sub>, from the  
339 reassigned clade has features of methionine identity (including an A73 discriminator base and  
340 G2:C71 and C3:G70 base pairs in the acceptor stem) and lacks the important arginine identity  
341 element A20 in the D-loop (**Meinzel et al., 1993; Giegé et al., 1998**), supporting translation of AGG  
342 as methionine (**Figure 3C**). *In vitro* experiments have shown that anticodon mutations to tRNA<sub>CAU</sub><sup>Met</sup>  
343 disrupt recognition by the methionyl-tRNA synthetase in *E. coli*; however, the C35 change necessary  
344 to decode the AGG codon affects the least critical anticodon nucleotide (**Schulman and Pelka,**  
345 **1983**). The outgroup genomes contain a tRNA<sub>CCU</sub> with features of arginine identity (including a G73  
346 discriminator base and A20 in the D-loop). The genomic context of the tRNA<sub>CCU</sub> is similar in many  
347 reassigned clade and outgroup genomes, flanked by a tRNA<sub>CCG</sub><sup>Arg</sup> immediately downstream and a  
348 homolog of GenBank protein CDA36808.1 upstream (**Figure 3D**). This implies that the reassigned  
349 and outgroup tRNA<sub>CCU</sub> evolved from the same ancestral tRNA gene, and the reassigned methionine  
350 tRNA<sub>CCU</sub> likely emerged through a change in aminoacylation of an arginine tRNA<sub>CCU</sub> rather than  
351 through duplication and anticodon mutation of a methionine tRNA.

352 The reassigned genomes use an arginine-type tRNA<sub>UCU</sub> to decode the unaffected AGA arginine  
353 codon. Depending on the post-transcriptional modification of the U34 anticodon nucleotide, the  
354 arginine tRNA<sub>UCU</sub> could recognize AGG via wobble and potentially cause ambiguous translation. In *E.*  
355 *coli*, the U34 of tRNA<sub>UCU</sub> is modified to 5-methylaminomethyluridine (**Sakamoto et al., 1993**) which  
356 primarily decodes the AGA codon with a low level of AGG recognition (**Spanjaard et al., 1990**). **Mukai**  
357 **et al. (2015)** demonstrated that it is possible to engineer separate decodings for AGA and AGG in *E.*  
358 *coli* by reducing expression level of the tRNA<sub>UCU</sub> to the point where decoding of AGG by tRNA<sub>UCU</sub> is  
359 presumably insignificant in competition with the cognate tRNA<sub>CCU</sub>. In most outgroup genomes, AGA  
360 is the dominant arginine codon, while in the reassigned clade the preferred arginine codon is CGU  
361 (**Figure 3A**), which may indicate reduced demand and expression of tRNA<sub>UCU</sub> to avoid ambiguous  
362 translation of AGG. A similar potential for ambiguous translation due to U34 wobble exists with the  
363 previously known decoding of UGA as glycine and UGG as tryptophan in Absconditabacteria and  
364 Gracilibacteria (**Campbell et al., 2013; Rinke et al., 2013**).

### 365 **Reassignments of arginine codons CGA and CGG occur in clades with low genomic** 366 **GC content**

367 The remaining four clades with high-confidence codon reassignments all affect the arginine codons  
368 CGA and/or CGG (**Figure 4**). Three clades are in the phylum Firmicutes: the genus *Peptacetobacter* is  
369 predicted to translate CGG as glutamine (**Figure 4–Figure Supplement 1**), a clade of uncultivated  
370 Bacilli in the GTDB order RFN20 (same as the AGG-reassigned Bacilli) is predicted to translate  
371 CGG as tryptophan (**Figure 4–Figure Supplement 2**), and members of the genus *Anaerococcus*  
372 are also predicted to translate CGG as tryptophan (**Figure 4–Figure Supplement 3**). The fourth

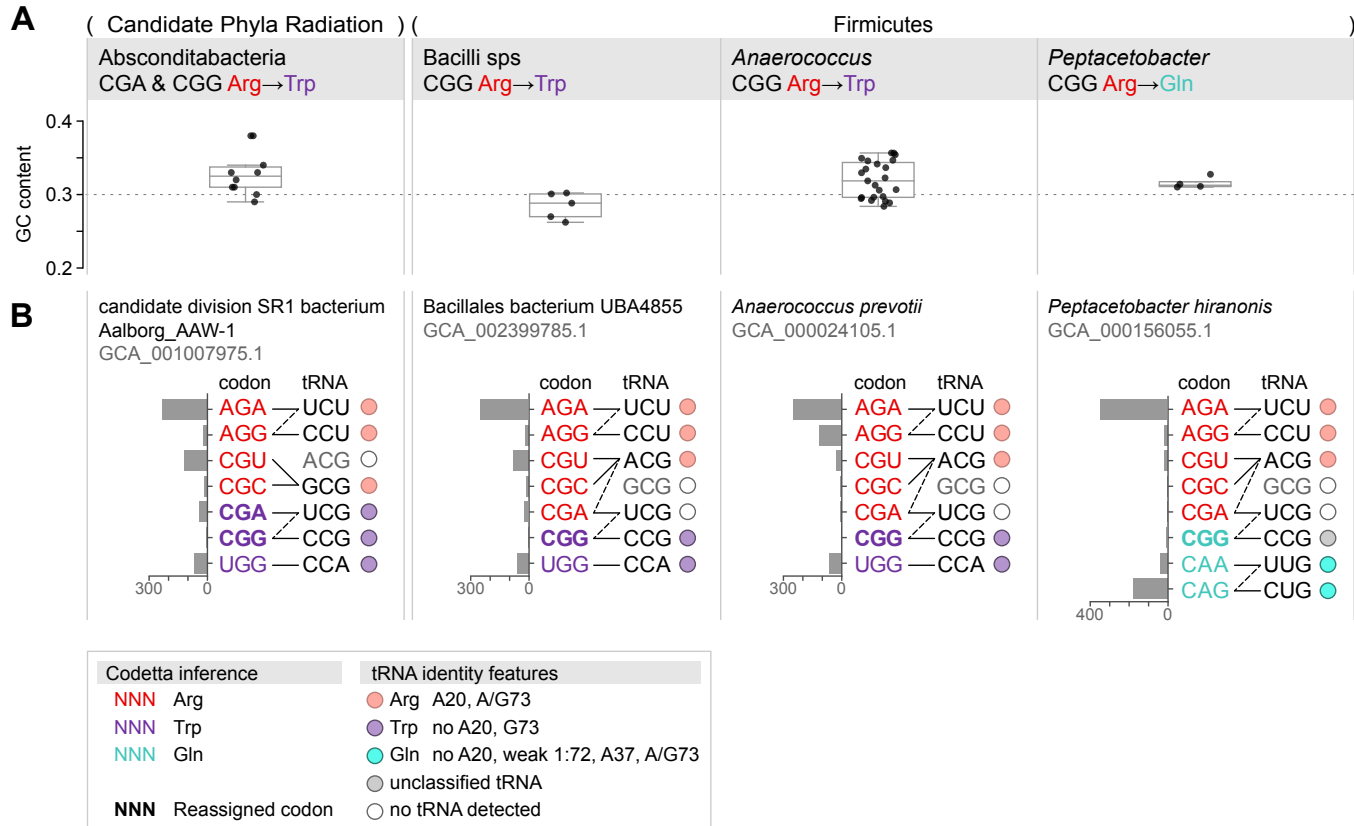

**Figure 4.** Summary of GC content, codon usage, and tRNA genes of four CGA and/or CGG reassignments. (A) Distribution of genomic GC contents across all species in the reassigned clades. (B) For each reassigned clade, we selected a representative species to show codon usage and tRNA decoding ability. Codon usage is plotted for the reassigned codon and for all other codons of the original and new amino acids in usage per 10,000 in Pfam alignments. Codons are colored by their Codetta inference and reassigned codons are bolded. The lines connecting codons and tRNA anticodons represent the likely wobble decoding capabilities, with dashed lines representing likely weaker interactions. The anticodon ACG is presumed to be modified to ICG, and UCG is presumed to be modified in a way that restricts wobble to CGA and CGG, but could potentially recognize CGU and CGC as well depending on the true modification state. Anticodons in gray font are not expected to be found in the respective clade. Presence of tRNA genes is indicated by filled circles, colored by the predicted amino acid charging based on the identity elements in the key.

**Figure 4-Figure supplement 1.** Reassignment of CGG→Gln in *Peptacetobacter*.

**Figure 4-Figure supplement 2.** Reassignment of CGG→Trp in a clade of Bacilli.

**Figure 4-Figure supplement 3.** Reassignment of CGG→Trp in *Anaerococcus*.

**Figure 4-Figure supplement 4.** Reassignment of CGA and CGG→Trp in Absconditabacteria.

**Figure 4-source data 1.** Table for each reassignment containing genome accessions, Codetta CGA/CGG inference, tRNA gene presence, codon usage, and genome GC content for the reassigned clade and outgroup species.

373 clade is Absconditabacteria (also known as Candidate Division SR1, part of the Candidate Phyla  
374 Radiation), which is predicted to have reassigned CGA and CGG both to tryptophan (**Figure 4–Figure**  
375 **Supplement 4**), in addition to the already known reassignment of UGA from stop to glycine.

376 In contrast to the reassignment of AGG to become the dominant methionine codon (described in  
377 the previous section), these CGA/CGG reassignments resemble earlier stages of codon reassignment  
378 where the reassigned codon has not yet rebounded in frequency through synonymous substitutions  
379 with the new amino acid. Due to the rarity of the reassigned CGA/CGG codons, these predictions  
380 are based on fewer aligned Pfam consensus columns and may be more prone to error. As a check  
381 for each reassignment, we looked for examples of the reassigned codon in conserved regions  
382 of single-copy gene alignments (**Figure 4–Figure Supplement 1B - Figure 4–Figure Supplement 4B**)  
383 and found multiple supporting positions for all reassigned codons except the extremely rare  
384 CGG codon in *Anaerococcus*. We also looked for tRNA genes with an anticodon and amino acid  
385 identity elements consistent with the reassignment (**Figure 4–Figure Supplement 1 - Figure 4–**  
386 **Figure Supplement 4**), and found consistent tRNAs for all clades except for *Peptacetobacter* whose  
387 CGG-decoding tRNA<sub>CCG</sub> resembles neither an arginine or glutamine isotype. While amino acid  
388 conservation at the reassigned codon and sequence-based prediction of tRNA charging may lend  
389 support to a predicted codon reassignment, only experimental confirmation can establish how the  
390 reassigned codons are translated *in vivo* and whether there is ambiguous translation. In particular,  
391 *Anaerococcus* and *Peptacetobacter* include culturable species and may be experimentally confirmed  
392 in the future.

393 The four CGA/CGG candidate reassignments share several features that suggest common  
394 evolutionary forces at play. Most notable is the very low genomic GC content of the reassigned  
395 clades (0.26-0.38, **Figure 4A**). In all four clades, the usage of GC-rich CGN-box codons—including CGA  
396 and CGG—is depressed and arginine residues are primarily encoded by AGA codons (**Figure 4B**).  
397 In the three Firmicute CGG reassignments, CGG is an extremely rare codon (codon usage <6 per  
398 10,000 in aligned Pfam domains for all species). In the Absconditabacteria, CGG also tends to be  
399 quite rare (<7 per 10,000 in all but one species) with CGA slightly more abundant (<37 per 10,000 in  
400 all species). In one Absconditabacteria (assembly GCA\_002791215.1), the frequency of both CGA  
401 and CGG approaches the frequency of the canonical tryptophan codon UGG, consistent with a more  
402 advanced stage of codon reassignment (usage of CGA and CGG is 30 and 24 per 10,000, compared  
403 to 35 for UGG). Low genomic GC content is thought to be created by mutational bias in favor of  
404 AT nucleotides, causing a gradual shift towards synonymous codons with lower GC compositions  
405 (**Knight et al., 2001b; Muto and Osawa, 1987**). This may have helped disfavor usage of CGA and/or  
406 CGG prior to reassignment, lessening the impact of changing the codon meaning.

407 The tRNAs used to decode the CGN codon box may have also influenced the reassignment  
408 of CGA and CGG codons. A shared feature of the three Firmicute CGG reassignments is that the  
409 tRNA<sub>UCG</sub> is missing (**Figure 4B**), presumably lost prior to or during the reassignment of CGG. If  
410 the tRNA<sub>UCG</sub> were present, it would likely recognize both CGA and CGG via wobble which would  
411 complicate assigning different amino acid meanings to those two codons. In the absence of tRNA<sub>UCG</sub>,  
412 CGA (along with CGU and CGC) is presumably decoded by a tRNA<sub>ICG</sub><sup>Arg</sup> (derived by deamination of  
413 tRNA<sub>ACG</sub><sup>Arg</sup>, the only widespread instance of inosine tRNA wobble in bacteria). This leaves CGG to  
414 be decoded solely by a tRNA<sub>CCG</sub> (**Figure 4B**). In this situation, CGG is one of a few codons in the  
415 genetic code decoded by a single dedicated tRNA, potentially facilitating codon reassignment since  
416 the translational meaning of CGG can now be altered independently of neighboring codons. The  
417 inosine wobble modification is not used by some deeply branching bacteria (**Rafels-Ybern et al.,**  
418 **2018**), and the tRNA<sub>ACG</sub><sup>Arg</sup> gene appears to be lacking in the Candidate Phyla Radiation, including  
419 Absconditabacteria. Instead, these bacteria use a tRNA<sub>GCG</sub><sup>Arg</sup> to decode CGU and CGC, and rely on a  
420 tRNA<sub>UCG</sub> and tRNA<sub>CCG</sub> to recognize CGA and CGG (**Figure 4B**). Since the ability of tRNA<sub>UCG</sub> to decode  
421 CGA and CGG makes it difficult to split the translational meanings of the two codons, it may explain  
422 why both CGA and CGG are reassigned to tryptophan together in the Absconditabacteria.

423 For some of these reassignments, close outgroup species may shed light on potential intermedi-



424 ate stages of codon reassignment. The CGG reassignment in the Absconditabacteria may extend  
425 to members of the sister clade Gracilibacteria– some Gracilibacteria were predicted to translate  
426 CGG as tryptophan, while others translate CGG as arginine (**Figure 4–Figure Supplement 4**). This  
427 may reflect a complicated history of CGG reassignment and possible reversion to arginine trans-  
428 lation. For the CGG reassignment in *Peptacetobacter*, the closest sister group (which includes the  
429 pathogen *Clostridioides difficile*) has extremely rare usage of CGG (<1 per 10,000 in aligned Pfam  
430 domains in all but two species) and appears to lack any tRNA capable of decoding CGG by standard  
431 codon-anticodon pairing rules (**Figure 4–Figure Supplement 1**). This may resemble an intermediate  
432 stage in codon reassignment before the ability to translate CGG as a new amino acid is gained,  
433 similar to the unassigned CGG codon in *Mycoplasma capricolum* (**Oba et al., 1991**). In *Anaerococcus*,  
434 all species contain a CGG-decoding tRNA<sub>CGG</sub> with features of tryptophan identity (**Figure 4–Figure**  
435 **Supplement 3**). Unexpectedly, members of an outgroup genus *Finegoldia* also have a tRNA<sub>CGG</sub> with  
436 features of tryptophan identity (CGG inferred to be '?' by Codetta). It is unclear if the tRNA<sub>CGG</sub> genes  
437 in these two clades share an evolutionary history or represent independent events.

## 438 Discussion

439 We present a method for computationally inferring the genetic code that can scale to analyze  
440 hundreds of thousands of genomes which we call Codetta. We validate Codetta on the well-studied  
441 reassignments of CUG in yeasts and rediscover the ambiguous translation of CUG as serine and  
442 leucine in *Ascoidea* and *Saccharomycopsis* by two differently charged tRNAs. We conduct the first  
443 systematic survey of genetic code usage across the majority of sequenced organisms, analyzing  
444 all sequenced bacteria and archaea (over 250,000 assemblies). The five new alternative genetic  
445 codes described here substantially expand the known diversity of codon reassignments in bacteria.  
446 Now, in addition to reassignments of the stop codon UGA to tryptophan or glycine, we have the  
447 first sense codon reassignments in bacteria, affecting the arginine codons AGG, CGA, and CGG.  
448 Two reassignments occur in culturable bacteria– in *Anaerococcus* and *Peptacetobacter*–and could be  
449 experimentally confirmed in the future, for example by proteomic mass spectrometry.

450 Since Codetta selects the most likely amino acid translation among the twenty canonical amino  
451 acids, some types of codon reassignments may be missed. We cannot predict reassignment to a  
452 noncanonical amino acid– for such codons, Codetta would pick the non-specific model or an amino  
453 acid that is used similarly in other species. We also cannot directly detect ambiguous translation,  
454 which may represent an important stage in codon reassignment. However, the failure to infer an  
455 amino acid translation despite a significant number of aligned Pfam consensus columns may hint  
456 at ambiguous translation, as was the case for CUG in *Ascoidea* and *Saccharomycopsis*. Since we do  
457 not model translational initiation and termination, we cannot detect the use of new start and stop  
458 codons or context-dependent stop codons that also possess an amino acid meaning, known to  
459 occur in some eukaryotes (**Swart et al., 2016; Heaphy et al., 2016; Záhonová et al., 2016**).

460 Expanding our analysis to eukaryotic, organellar, and viral genomes will help fill in the diversity  
461 of alternative genetic codes, but poses additional challenges. Since we align profile HMMs to  
462 a six-frame translation of the entire genome, the pervasive pseudogenes in many eukaryotic  
463 genomes will likely increase the rate of incorrect codon inferences by having sufficient homology for  
464 alignment but enough accumulated mutations to cause incorrect pairing of codons to consensus  
465 columns. Smaller scale surveys of eukaryotic genetic code diversity have focused on transcriptomic  
466 datasets (**Swart et al., 2016; Heaphy et al., 2016**), which may alleviate this problem. Some viral and  
467 organellar genomes have very few protein-coding genes which may limit the ability to confidently  
468 infer the entire genetic code. One strategy is to improve sensitivity at the cost of generalizability by  
469 using clade-specific profile HMMs instead of Pfam, which may increase the proportion of aligned  
470 coding sequence. Another challenge in some organellar genomes is extensive mRNA editing  
471 (**Gray, 1996; Alfonzo et al., 1997**), which violates our assumption that the genomic codon sequence  
472 represents the mRNA sequence and may require analyzing the edited transcriptome to ensure  
473 correct correspondence of codons to profile HMM positions.

474 In the ‘codon capture’ model of codon reassignment, genome-wide pressures such as biased  
475 GC content or genome reduction drive a codon to near extinction such that the codon can acquire  
476 a new tRNA decoding with a minimal effect on translation (*Osawa and Jukes, 1989*). Most UGA  
477 reassignments in bacteria occur in clades with very low genomic GC content, which is thought to  
478 have reduced UGA to very low usage in favor of the stop codon UAA. This includes the Mycoplas-  
479 matales and Entomoplamatales (0.24-0.39 GC) (*Jukes, 1985; Bové, 1993*), Absconditabacteria and  
480 Gracilibacteria (0.21-0.53 GC, *Figure 4–source data 1*) (*Campbell et al., 2013; Rinke et al., 2013*),  
481 and most insect endosymbiotic bacterial reassignments (0.13-0.17 GC, with the notable exception of  
482 *Hodgkinia cicadicola* with 0.58 GC) (*McCutcheon and Moran, 2010; Bennett and Moran, 2013; Salem*  
483 *et al., 2017; McCutcheon et al., 2009*). The CGA and/or CGG reassignments described here similarly  
484 exhibit low genomic GC content (0.26-0.38) and very rare usage of GC-rich codons including CGA  
485 and CGG. A codon does not need to completely disappear for reassignment to be facilitated by rare  
486 codon usage, and it is likely that a brief period of translational ambiguity or inefficiency helps drive  
487 the remaining codon substitutions. We posit that, in bacteria, reduction in codon usage driven by  
488 genome-wide processes plays a major role in enabling codon reassignment and may explain why  
489 codon reassignments repeatedly evolve in clades such as Firmicutes (known for their low genomic  
490 GC content) and lifestyles such as endosymbiosis (which is often accompanied by genome reduction  
491 and skewed GC content) (*McCutcheon and Moran, 2011*).

492 All five of the new reassignments affect arginine codons (AGG, CGA, and CGG). While these are  
493 the first instances of arginine codon reassignment in non-organellar genomes, several arginine  
494 reassignments are known in mitochondria: in various metazoan mitochondria the codons AGA and  
495 AGG have been reassigned to serine, glycine, and possibly stop and AGG has been reassigned to  
496 lysine (*Knight et al., 2001a; Abascal et al., 2006a*), and in various green algal mitochondria AGG  
497 has been reassigned to alanine and methionine and CGG to leucine (*Noutahi et al., 2019*). Arginine  
498 codons have several unique features that may predispose them to codon reassignment. First,  
499 across the tree of life, arginine has an over-representation of codons in the genetic code relative to  
500 usage in proteins (*Jukes et al., 1975; King and Jukes, 1969*), contributing to rare usage of the least  
501 favored arginine codon. Second, the six arginine codons range from one to three GC nucleotides in  
502 composition (only equaled by leucine), which may create greater bias in codon usage in response to  
503 genomic GC content than for amino acids with less GC variability in their codons. In organisms with  
504 small genomes, these features alone might make the rarest arginine codon very low in number and  
505 more susceptible than other codons to reassignment. The arginine codon CGG may be even more  
506 of a target for reassignment because, in most bacteria, the only widespread instance of inosine  
507 tRNA wobble is used to decode the CGU, CGC, and CGA arginine codons (*Grosjean et al., 2010*). In  
508 the absence of a tRNA<sub>UCG</sub>, CGG is decoded by a dedicated tRNA<sub>CCG</sub> and can be reassigned without  
509 affecting the translation of other codons.

510 Some codon reassignments have convergently reappeared across the tree of life: CGG to trypto-  
511 phan in three bacterial clades described here, AGG to methionine in a clade of Bacilli described  
512 here and in green algal mitochondria (*Noutahi et al., 2019*), UGA to tryptophan in multiple bacterial,  
513 mitochondrial, and eukaryotic lineages (*Knight et al., 2001a*), and others. Recurrent changes could  
514 reflect 1) a common evolutionary process, e.g. low GC content-driven reassignments disproportion-  
515 ately affecting codons sensitive to GC fluctuations, or 2) shared constraints imposed by conserved  
516 translational machinery, including tRNAs and aminoacyl-tRNA synthetases. For example, the tRNA  
517 anticodon-codon pairing rules dictate that U- and C-ending codons cannot be assigned separate  
518 meanings, and indeed this has not been observed in any known genetic codes. This may explain  
519 why in low GC content genomes, we see reassignments of the arginine codon CGG but not the  
520 arginine codon CGC, which would have to be reassigned together with CGU. The selection of amino  
521 acid changes in the codon reassignments described here is not clearly explained by biochemical  
522 similarity (except possibly for the reassignment of CGG from arginine to glutamine). The amino acid  
523 choice may be related to the constraints on evolving new tRNA anticodons. Most of the changes de-  
524 scribed here (and indeed all of the changes known in bacteria) involve a single nucleotide difference

525 from cognate anticodons: tRNA<sub>CCU</sub> in addition to tRNA<sub>CAU</sub><sup>Met</sup> for the AGG to methionine reassignment,  
526 tRNA<sub>CCG</sub> in addition to tRNA<sub>CCA</sub><sup>Trp</sup> for the CGG to tryptophan reassignments, and tRNA<sub>CCG</sub> in addition  
527 to tRNA<sub>CUG</sub><sup>Gln</sup> for the CGG to glutamine reassignment. Evolving a new anticodon through a single mu-  
528 tation may be more probable than through multiple mutations. However, the methionine tRNA<sub>CCU</sub>  
529 involved in the reassignment of AGG in a clade of Bacilli appears to have evolved from an arginine  
530 tRNA<sub>CCU</sub> through mutations that altered aminoacyl-tRNA synthetase recognition, rather than by an  
531 anticodon mutation to a methionine tRNA<sub>CAU</sub> gene. Alternatively, this pattern could result from  
532 a limitation on the new anticodons that an aminoacyl-tRNA synthetase could accept, since most  
533 aminoacyl-tRNA synthetases use the anticodon in part to distinguish cognate and non-cognate  
534 tRNAs (Giegé *et al.*, 1998). Upon characterizing the diversity of genetic codes in other parts of  
535 the tree of life, we may discover that the general patterns and evolutionary pressures differ from  
536 bacteria, reflecting differences in translational machinery, lifestyle, or genome characteristics.

## 537 Methods

### 538 Computational inference of the genetic code from nucleotide sequence

539 A preliminary translation of the input nucleotide sequences is produced by first breaking any  
540 long sequences into nonoverlapping 100 Kb pieces (because of a limit on input protein sequence  
541 length for `hmmscan`), then translating into all six frames (as six polypeptide sequences) using the  
542 standard genetic code with stop codons translated as 'X'. A custom version of Pfam 32.0 profiles was  
543 produced from Pfam seed alignments using `hmmbuild --enone`, which turns off entropy weighting,  
544 resulting in emission probability parameters closer to the original amino acid frequencies in the  
545 input alignments. Significant homologous alignments were identified by searching each translated  
546 polypeptide against the custom Pfam database using `hmmscan` from HMMER 3.1b2 for domain hits  
547 with E-value < 10<sup>-10</sup>.

548 Alignments were further filtered to remove uncertainly aligned consensus columns (posterior  
549 probabilities of alignment <95%). By default, no single Pfam consensus columns was allowed to  
550 account for more than 1% of total aligned consensus columns for a codon, in order to mitigate  
551 some artifacts such as repetitive pseudogene families in some genomes; when this happened, the  
552 number of codon positions aligned to that specific consensus column was downsampled to 1% of  
553 the total (if a codon was aligned to fewer than 100 Pfam consensus columns total, then each unique  
554 consensus columns was downsampled to 1 occurrence). We excluded hits to five classes of Pfam  
555 models including mitochondrial proteins, viral proteins, selenoproteins, pyrrolysine-containing  
556 proteins, and proteins belonging to transposons and other mobile genetic elements. These filtered  
557 sets of aligned consensus columns defined the input  $\vec{C}$  sets for each codon. The equations from  
558 the main text are then used (in log-probability calculations for numerical stability) to infer  $P(M|\vec{C}^z)$   
559 for each codon, with a default decoding probability threshold of 0.9999.

560 The computational requirements are dominated by the `hmmscan` step, which takes about an  
561 hour on a single CPU core for a ~12 Maa six-frame translation of a typical 6 Mb bacterial genome.  
562 We ran different genomes in parallel on a 30,000 core computing resource, the Harvard Cannon  
563 cluster. We implemented this method as Codetta v1.0, a Python 3 program that can be found at  
564 <https://github.com/kshulgina/codetta/releases/tag/v1.0>.

### 565 Measuring error rate and power on synthetic datasets

566 A six-frame translation of the *E. coli* O157:H7 str. Sakai genome (GCA\_000008865.2) was searched  
567 against the custom `--enone` Pfam 32.0 profile database as described above. We generated 400  
568 different random subsamples each of 2, 5, 10, 20, 50, or 500 aligned consensus columns per  
569 sense codon and inferred the most likely decoding as described above. A codon inference was  
570 considered "true" (T) if the correct amino acid meaning was inferred, "false" (F) if an incorrect amino  
571 acid meaning was inferred, and "uninferred" (U) if the non-specific decoding was most probable or  
572 if no model surpassed the model probability threshold. For a given model probability threshold,

573 per-codon error rate is the fraction of samples with a false inference ( $F / (T + F + U)$ ). Per-codon  
574 power is the fraction of samples with a true inference ( $T / (T + F + U)$ ). Both values were evaluated  
575 individually for each sense codon and also aggregated across all sense codons.

### 576 **Genetic code inference of archaeal and bacterial genomes**

577 Assembly identifiers for all archaeal and bacterial genomes were downloaded from the NCBI  
578 Genome database on June 4th, 2020, and Codetta analysis was performed on all archaeal and  
579 bacterial genome assemblies. Genetic code inference results for all analyzed genomes can be found  
580 in **Table 2**-source data 1. A variety of additional files supporting new genetic codes are available at  
581 [https://github.com/kshulgina/ShulginaEddy\\_21\\_genetic\\_codes](https://github.com/kshulgina/ShulginaEddy_21_genetic_codes).

582 We used the NCBI taxonomy database (downloaded on July 15th, 2020) to cross-reference all  
583 assemblies with taxonomic identifiers. All analyzed genome assemblies from GenBank are associ-  
584 ated with a NCBI taxonomic ID (taxid). Because some of these taxids correspond to subspecies or  
585 strain-level designations, we assigned a species-level taxid to each assembly by iteratively stepping  
586 up the NCBI taxonomy until a species-level node was reached. To create a dereplicated dataset, we  
587 picked one genome assembly per NCBI species-level taxid. If multiple genome assemblies were  
588 associated with an NCBI species-level taxid, assemblies were sorted based on RefSeq category  
589 (reference, representative, or neither) and then genome completeness level and a single genome  
590 assembly was randomly selected from the highest ranked category.

591 Phage assemblies derived from the same metagenomic samples as the AGG-recoding Bacilli  
592 were obtained by identifying the phage assemblies from *Al-Shayeb et al. (2020)* whose sample  
593 accessions were linked to the metagenomic sequencing experiments SRX834619, SRX834622,  
594 SRX834629, SRX834636, SRX834653, SRX834655, or SRX834666. Codetta analysis of the phage  
595 genomes was performed as described above.

### 596 **Cross-referencing the NCBI taxonomy with known distributions of genetic code 597 usage**

598 A complete list of bacterial clades previously known to use alternative genetic codes was collated  
599 with corresponding references for genetic code discovery and taxonomic distribution (**Table 1**).  
600 For each clade, we determined a set of NCBI taxids best defining the phylogenetic extent of  
601 each reassigned clade. We used this to generate a curated genetic code annotation for all NCBI  
602 species-level taxids: for the taxids defining each reassigned clade, all species-level child nodes were  
603 annotated with the alternative genetic code; all remaining species-level taxids were annotated with  
604 the standard genetic code.

605 We used the Genome Taxonomy Database (GTDB, version R05-RS95) (*Parks et al., 2020*) to  
606 determine the phylogenetic placement of species that use candidate new genetic codes and to  
607 identify the most closely related outgroup species.

### 608 **Identification of tRNA genes and other translational components**

609 The tRNA gene content of genomes was determined by running tRNAscan-SE 2.0 (*Chan et al.,*  
610 **2019**) with default settings and a tRNA model appropriate for the domain of life (i.e. option  $-E$  for  
611 eukaryotes,  $-B$  for bacteria,  $-A$  for archaea). To help ensure that tRNAs of interest were not missed,  
612 we also ran a low-stringency search with the general tRNA model and no cutoff score (options  $-G$   
613  $-X 0$ ) and manually examined the output.

614 We searched bacterial genomes for release factor genes with hmmscan for the TIGRFAM 15.0  
615 (*Haft et al., 2013*) release factor 2 model (TIGR00020) and release factor 1 model (TIGR00019)  
616 against a six-frame translation of the entire genome with default settings. Since these genes are  
617 homologs, if the two models hit overlapping genomic coordinates, we kept the hit with the more  
618 significant E-value.

619 For the AGG arginine to methionine reassignment in a clade of Bacilli, we classified tRNA<sub>CCU</sub> genes  
620 as being primarily arginine acceptors if the tRNA had A20 in the D-loop and a A/G73 discriminator

621 base, and primarily methionine acceptors if the tRNA had an A73 discriminator base and not A20  
622 in the D-loop (*Giegé et al., 1998*). The weaker methionine identity elements G2:C70, C3:G69 in the  
623 acceptor stem were used to support the assignment (*Meinzel et al., 1993*). In the reassignment of  
624 CGG to glutamine in *Peptacetobacter*, we classified tRNAs as arginine-type using the rules above, and  
625 as glutamine-type if the tRNA was missing arginine identity element A20 and contained the set of  
626 glutamine identity elements consisting of a weak 1:72 basepair, A37, and A/G73 (*Jahn et al., 1991*).  
627 We took the additional glutamine identity elements G2:C71 and G3:C70 in the acceptor stem, G38  
628 in the anticodon loop, and G10 in the D-stem as support for glutamine identity (*Jahn et al., 1991*;  
629 *Hayase et al., 1992*). For the reassignments of CGA and/or CGG arginine to tryptophan, we classified  
630 tRNAs as primarily arginine acceptors using the rules above, and provisionally as tryptophan  
631 acceptors if the tRNA had a G73 discriminator base and not A20 in the D-loop (*Giegé et al., 1998*).  
632 We considered the weak tryptophan identity element A/G1:U72 in the acceptor stem as support  
633 for tryptophan identity but did not require it (*Himeno et al., 1991*). In the Absconditabacteria and  
634 Gracilibacteria, we classified tRNA<sub>UCA</sub> genes as glycine acceptors if the tRNA had G1:C72, C2:G71,  
635 G3:C70 in the acceptor stem and U73 discriminator base (*Giegé et al., 1998*). We refrained from  
636 assigning identity if the tRNA did not fit the above patterns or if the D-loop sequence was unusual  
637 such that it was unclear which nucleotide is N20. D-loop and variable loop insertions were placed  
638 at positions following the convention of *Sprinzel et al. (1998)*.

### 639 **Multiple sequence alignment of BUSCO genes**

640 For some candidate novel alternative genetic codes, we constructed multiple sequence alignments  
641 of conserved single-copy bacterial genes from the BUSCO database v3 (*Waterhouse et al., 2018*).  
642 To identify orthologs of a BUSCO gene in a particular genome, we first created a dataset of putative  
643 protein sequences by translating all open reading frames longer than 50 codons using the inferred  
644 genetic code (assuming standard stop codons unless reassigned), with candidate reassigned codons  
645 translated as 'X'. Then, we queried each of the 148 bacterial BUSCO profile HMMs against all putative  
646 proteins using `hmmsearch` from HMMER 3.1b2 with default settings and an E-value cutoff of  $10^{-13}$ ,  
647 and picked the most significant hit if it also yielded a reciprocal best hit against the entire BUSCO  
648 profile HMM database using `hmmsearch` with the same E-value cutoff. Multiple sequence alignments  
649 were generated using MAFFT v7.429 (*Katoh and Standley, 2013*) with default settings.

650 For the described novel genetic codes, BUSCO alignments containing the reassigned codon in  
651 the reassigned clade were individually inspected and alignments containing the reassigned codon  
652 at conserved positions in well-aligned regions were preferentially selected as example alignments.

### 653 **Annotation of genomic context**

654 To determine the genomic context surrounding the tRNA<sub>CCU</sub> gene in the uncultivated Bacilli predicted  
655 to have reassigned AGG to methionine and in close outgroup genomes, we predicted tRNA and  
656 protein coding genes in the whole genome as described above. We annotated each putative protein  
657 coding gene with the reciprocal best hit homolog among annotated protein-coding genes in the  
658 outgroup assembly GCA\_000434395.1 using `phmmer` from HMMER 3.1b2 with a  $10^{-10}$  E-value cutoff.

### 659 **Phylogenetic grouping and Codetta analysis of CUG usage by budding yeasts**

660 For analysis of CUG translation in budding yeasts, we selected all genomes belonging to the  
661 class Saccharomycetes (NCBI taxid 4891), which represent 463 unique NCBI species taxids with  
662 at least one genome. The genomes were dereplicated to one assembly per species-level taxid  
663 as described above. Yeast species were split into six taxonomic categories based on the "major  
664 clade" annotation from the phylogenetic analysis by *Shen et al. (2018)* as follows: Outgroups (major  
665 clades: Lipomycetaceae, Trigonopsidaceae, Dipodascaceae/Trichomonascaceae, Alloascoideaceae,  
666 Sporopachydermia), CUG-Leu clade 1 (major clades: Phaffomycetaceae, Saccharomycodaceae,  
667 Saccharomycetaceae), CUG-Leu clade 2 (major clade: Pichiaceae), CUG-Ser (major clade: CUG-Ser1),  
668 CUG-Ala (major clade: CUG-Ala), and CUG-Ser/Leu (major clade: CUG-Ser2). Species that were



669 not included in the analysis by *Shen et al. (2018)* were sorted into the same major clade as other  
670 members of their annotated genus on NCBI. A single species (*Candida* sp. JCM 15000) could not be  
671 placed into a category and was excluded from the analysis. The expected CUG translation for each  
672 clade follows *Shen et al. (2018)* and is consistent with other studies of CUG translation (*Riley et al.,*  
673 *2016; Krassowski et al., 2018; Mühlhausen et al., 2018*). Genetic codes were predicted by Codetta  
674 as described above. A table describing all yeast genomes analyzed can be found in *Figure 2-source*  
675 *data 1*.

### 676 Identification of tRNA genes and isotype classification in yeasts

677 tRNA gene content of yeast genomes was determined using tRNAscan-SE 2.0 as described above.  
678 In eukaryotes, only leucine- and serine-tRNAs have a long (>12 nucleotide) variable loop so we used  
679 this feature to confirm the tRNA<sub>CAG</sub> identity as serine or leucine. In yeast, serine tRNAs typically have  
680 a conserved G73 discriminator base but can tolerate any nucleotide (*Himeno et al., 1997*), while  
681 leucine tRNA identity is conferred by a A73 discriminator base and A35 and G37 in anticodon loop  
682 (*Soma et al., 1996*). We categorized tRNA<sub>CAG</sub> genes as either serine-acceptors or leucine-acceptors  
683 based on the presence of these features. In some CUG-Ser clade species, serine CAG-tRNAs  
684 containing a G37 have been found to be charged with leucine at a low level (3%) (*Suzuki et al., 1997*);  
685 for categorization purposes, we would consider these tRNAs to be primarily serine-acceptors.

### 686 *S. malanga* growth and RNA extraction

687 *S. malanga* (NRRL Y-7175) was obtained from the Agricultural Research Service Culture Collection  
688 (Peoria, Illinois USA). Cells were inoculated into 5 mL of YPD liquid media (containing 1% yeast  
689 extract, 2% peptone, and 2% dextrose) from a colony on a YPD agar plate and grown to saturation  
690 for 4 days at 25°C on rotating wheel.

691 Total RNA was extracted in acidic conditions to preserve tRNA charging, following the steps  
692 outlined in *Varshney et al. (1991)* with the following modifications. Cells were harvested by cen-  
693 trifugation (5 minutes at 4,000 rpm at 4°C), resuspended in 500  $\mu$ L ice cold buffer containing 0.3 M  
694 NaOAc pH 4.5 and 10 mM EDTA and added to 500  $\mu$ L ice cold phenol:chloroform (pH 4.5) and 500  
695  $\mu$ L of 0.4-0.5  $\mu$ m acid washed glass beads for cell lysis. All RNA extraction steps were performed  
696 at 4°C. In the first round of extraction, cells were vortexed for 30 minutes, rested on ice for 3  
697 minutes, centrifuged for 15 minutes at 20,000 $\times$ g, and the aqueous layer was transferred to 500  $\mu$ L  
698 of phenol:chloroform (pH 4.5), which was subject to a second round of extraction (identical, except  
699 for 3 minute vortex). A last round of extraction was performed in 500  $\mu$ L of chloroform with a  
700 15 second vortex and 2 minute centrifugation. RNA in the aqueous phase was precipitated and  
701 resuspended in buffer containing 10 mM NaOAc pH 4.5 and 1 mM EDTA.

### 702 Northern blotting for tRNA expression

703 The single-stranded DNA probes used for detection of *S. malanga* tRNA<sub>CAG</sub><sup>Ser</sup> (5' GAAATCCCAGCGC-  
704 CTTCTGTGGGCGGCGCCTTAACCAAACCTCGGC 3') and *S. malanga* tRNA<sub>CAG</sub><sup>Leu</sup> (5' TTGACAATGAGACTC-  
705 GAACTCATACCTCCTAG 3') were 5' end-labelled with [ $\gamma$ -P<sup>32</sup>]-ATP by T4 polynucleotide kinase (New  
706 England Biosciences) and purified using ProbeQuant G-50 Micro Columns (GE Healthcare Life  
707 Sciences).

708 *In vitro* transcribed tRNAs were used as controls for probe specificity. For the *S. malanga* tRNA<sub>CAG</sub><sup>Ser</sup>  
709 probe, an *in vitro* transcribed version of the target tRNA<sub>CAG</sub><sup>Ser</sup> was used as a positive control and  
710 an *in vitro* transcribed version of tRNA<sub>CGU</sub><sup>Ser</sup> was used as a control for cross-hybridization. For the  
711 tRNA<sub>CAG</sub><sup>Leu</sup> probe, an *in vitro* transcribed version of the target tRNA<sub>CAG</sub><sup>Leu</sup> was used as a positive con-  
712 trol and an *in vitro* transcribed version of tRNA<sub>CAA</sub><sup>Leu</sup> was used as a control for cross-hybridization.  
713 Cross-hybridization controls were selected by aligning the reverse complement of the probe se-  
714 quence using MAFFT v7.429 (*Katoh and Standley, 2013*) with default settings to all tRNA genes in  
715 the *S. malanga* genome (found by tRNAscan-SE 2.0), and selecting the non-target tRNA with the  
716 highest pairwise alignment score. *In vitro* transcribed tRNAs were produced using the MAXIscript

717 T7 Transcription Kit (Thermo) from a DNA template composed of a T7 promoter (5' GATCTAATAC-  
718 GACTCACTATAGGGAGA 3') followed by the tRNA sequence. The resulting tRNA transcript has an  
719 additional six nucleotides of the promoter included at the 5' end. CCA-tails were not included in the  
720 *in vitro* transcribed tRNA sequences.

721 Total RNA and *in vitro* transcribed controls for probe specificity were denatured in formamide  
722 buffer (Gel Loading Buffer II, Thermo) at 90°C for 5 minutes and electrophoretically separated on a  
723 10% TBE urea gel (Novex). Gels were rinsed in 0.5x TBE and RNA was transferred onto a Hybond N+  
724 membrane (GE Healthcare) in 0.5x TBE by semi-dry transfer (Bio-Rad Transblot) at 3 mA/cm<sup>2</sup> for 1  
725 hr. Blots were crosslinked on each side using a Stratalinker UV crosslinker on the “auto-crosslink”  
726 setting. Blots were prehybridized in PerfectHyb Plus Hybridization buffer (Sigma) at 64°C for 1 hour  
727 prior to incubation with the radiolabelled DNA probe overnight. Blots were washed at 64°C twice in  
728 low stringency buffer (0.1% SDS, 2x SSC) for 15 minutes and once in high stringency buffer (0.1%  
729 SDS, 0.1x SSC) for 10 minutes, exposed on storage phosphor screens, and scanned using a Typhoon  
730 imager.

### 731 **Acid urea PAGE Northern blotting for tRNA charging**

732 For the partial deacylation control, total RNA was treated in 100 mM Tris pH 7.0 at 37°C for 30  
733 minutes, quenched with an equal volume of buffer containing 50 mM NaOAc and 100mM NaCl,  
734 and precipitated. Electrophoresis on acid urea polyacrylamide gels was performed as described in  
735 *Varshney et al. (1991)*. 4 µg of total RNA and partial deacylation control in acid urea sample buffer  
736 (0.1 NaOAc pH 4.5, 8M urea, 0.05% bromophenol blue, 0.05% xylene cyanol) were loaded onto a  
737 0.4mm thick 6.5% polyacrylamide gel (SequaGel) containing 8M urea and 100mM NaOAc pH 4.5  
738 and run for 18 hours at 450 V in 4°C with 100mM NaOAc pH 4.5 running buffer. The region between  
739 the two dyes corresponds to the tRNA size range, and was cut out and transferred onto a blot for  
740 probing following the same steps as above for Northern blotting.

### 741 **Acknowledgments**

742 We thank members of the Eddy lab for discussions and for comments on the manuscript, A. Murray  
743 and A. Darnell for advice and guidance on Northern blotting experiments, and R. Helmiss for  
744 feedback on data presentation. Computations were performed on the Cannon cluster, supported  
745 by the Harvard FAS Division of Science's Research Computing Group. Research reported in this  
746 publication was supported by the Howard Hughes Medical Institute and by the National Human  
747 Genome Research Institute of the National Institutes of Health under award numbers F31-HG010984  
748 (to YS) and R01-HG009116 (to SRE). The content is solely the responsibility of the authors and does  
749 not necessarily represent the official views of the National Institutes of Health.

### 750 **References**

- 751 **Abascal F**, Posada D, Knight RD, Zardoya R. Parallel evolution of the genetic code in arthropod mitochondrial  
752 genomes. *PLoS Biology*. 2006; 4:e127. doi: [10.1371/journal.pbio.0040127](https://doi.org/10.1371/journal.pbio.0040127).
- 753 **Abascal F**, Zardoya R, Posada D. GenDecoder: genetic code prediction for metazoan mitochondria. *Nucleic*  
754 *Acids Research*. 2006; 34:W389–W393. doi: [10.1093/nar/gkl044](https://doi.org/10.1093/nar/gkl044).
- 755 **Al-Shayeb B**, Sachdeva R, Chen LX, Ward F, Munk P, Devoto A, Castelle CJ, Olm MR, Bouma-Gregson K, Amano  
756 Y, He C, Méheust R, Brooks B, Thomas A, Lavy A, Matheus-Carnevali P, Sun C, Goltsman DSA, Borton MA,  
757 Sharrar A, et al. Clades of huge phages from across Earth's ecosystems. *Nature*. 2020; 578:425–431. doi:  
758 [10.1038/s41586-020-2007-4](https://doi.org/10.1038/s41586-020-2007-4).
- 759 **Alfonzo JD**, Thiemann O, Simpson L. The mechanism of U insertion/deletion RNA editing in kinetoplastid  
760 mitochondria. *Nucleic Acids Research*. 1997; 25:3751–3759. doi: [10.1093/nar/25.19.3751](https://doi.org/10.1093/nar/25.19.3751).
- 761 **Almeida A**, Mitchell AL, Boland M, Forster SC, Gloor GB, Tarkowska A, Lawley TD, Finn RD. A new genomic  
762 blueprint of the human gut microbiota. *Nature*. 2019; 568:499–504. doi: [10.1038/s41586-019-0965-1](https://doi.org/10.1038/s41586-019-0965-1).

- 763 **Barrell BG**, Bankier AT, Drouin J. A different genetic code in human mitochondria. *Nature*. 1979; 282:189–194.  
764 [doi: 10.1038/282189a0](https://doi.org/10.1038/282189a0).
- 765 **Bennett GM**, Moran NA. Small, smaller, smallest: the origins and evolution of ancient dual symbioses in a  
766 phloem-feeding insect. *Genome Biology and Evolution*. 2013; 5:1675–1688. [doi: 10.1093/gbe/evt118](https://doi.org/10.1093/gbe/evt118).
- 767 **Bové JM**. Molecular features of mollicutes. *Clinical Infectious Diseases*. 1993; 17 Suppl 1:S10–31. [doi:](https://doi.org/10.1093/clinids/17.supplement_1.s10)  
768 [10.1093/clinids/17.supplement\\_1.s10](https://doi.org/10.1093/clinids/17.supplement_1.s10).
- 769 **Campbell JH**, O'Donoghue P, Campbell AG, Schwientek P, Sczyrba A, Woyke T, Soll D, Podar M. UGA is an  
770 additional glycine codon in uncultured SR1 bacteria from the human microbiota. *PNAS*. 2013; 110:5540–5545.  
771 [doi: 10.1073/pnas.1303090110](https://doi.org/10.1073/pnas.1303090110).
- 772 **Caron F**, Meyer E. Does *Paramecium primaurelia* use a different genetic code in its macronucleus? *Nature*. 1985;  
773 314:185–188. [doi: 10.1038/314185a0](https://doi.org/10.1038/314185a0).
- 774 **Chan PP**, Lin BY, Mak AJ, Lowe TM. tRNAscan-SE 2.0: Improved detection and functional classification of transfer  
775 RNA genes. *bioRxiv*. 2019; [doi: 10.1101/614032](https://doi.org/10.1101/614032).
- 776 **Crick FH**. The origin of the genetic code. *Journal of Molecular Biology*. 1968; 38:367–379. [doi: 10.1016/0022-](https://doi.org/10.1016/0022-2836(68)90392-6)  
777 [2836\(68\)90392-6](https://doi.org/10.1016/0022-2836(68)90392-6).
- 778 **Cupples CG**, Pearlman RE. Isolation and characterization of the actin gene from *Tetrahymena thermophila*. *PNAS*.  
779 1986; 83:5160–5164. [doi: 10.1073/pnas.83.14.5160](https://doi.org/10.1073/pnas.83.14.5160).
- 780 **Dutilh BE**, Jurgelenaite R, Szklarczyk R, van Hijum SAFT, Harhangi HR, Schmid M, de Wild B, Francoijs KJ,  
781 Stunnenberg HG, Strous M, Jetten MSM, Op den Camp HJM, Huynen MA. FACIL: Fast and accurate genetic  
782 code inference and logo. *Bioinformatics*. 2011; 27:1929–1933. [doi: 10.1093/bioinformatics/btr316](https://doi.org/10.1093/bioinformatics/btr316).
- 783 **El-Gebali S**, Mistry J, Bateman A, Eddy SR, Luciani A, Potter SC, Qureshi M, Richardson LJ, Salazar GA, Smart A,  
784 Sonnhammer ELL, Hirsh L, Paladin L, Piovesan D, Tosatto SCE, Finn RD. The Pfam protein families database in  
785 2019. *Nucleic Acids Research*. 2019; 47:D427–D432. [doi: 10.1093/nar/gky995](https://doi.org/10.1093/nar/gky995).
- 786 **Giegé R**, Sissler M, Florentz C. Universal rules and idiosyncratic features in tRNA identity. *Nucleic Acids Research*.  
787 1998; 26:5017–5035. [doi: 10.1093/nar/26.22.5017](https://doi.org/10.1093/nar/26.22.5017).
- 788 **Gomes AC**, Miranda I, Silva RM, Moura GR, Thomas B, Akoulitchev A, Santos MAS. A genetic code alteration  
789 generates a proteome of high diversity in the human pathogen *Candida albicans*. *Genome Biology*. 2007;  
790 8:R206. [doi: 10.1186/gb-2007-8-10-r206](https://doi.org/10.1186/gb-2007-8-10-r206).
- 791 **Gray MW**. RNA editing in plant organelles: a fertile field. *PNAS*. 1996; 93:8157–8159. [doi:](https://doi.org/10.1073/pnas.93.16.8157)  
792 [10.1073/pnas.93.16.8157](https://doi.org/10.1073/pnas.93.16.8157).
- 793 **Grosjean H**, de Crécy-Lagard V, Marck C. Deciphering synonymous codons in the three domains of  
794 life: co-evolution with specific tRNA modification enzymes. *FEBS Letters*. 2010; 584:252–264. [doi:](https://doi.org/10.1016/j.febslet.2009.11.052)  
795 [10.1016/j.febslet.2009.11.052](https://doi.org/10.1016/j.febslet.2009.11.052).
- 796 **Haft DH**, Selengut JD, Richter RA, Harkins D, Basu MK, Beck E. TIGRFAMs and genome properties in 2013. *Nucleic*  
797 *Acids Research*. 2013; 41:D387–95. [doi: 10.1093/nar/gks1234](https://doi.org/10.1093/nar/gks1234).
- 798 **Hayase Y**, Jahn M, Rogers MJ, Sylvers LA, Koizumi M, Inoue H, Ohtsuka E, Söll D. Recognition of bases in  
799 *Escherichia coli* tRNA(Gln) by glutaminyl-tRNA synthetase: a complete identity set. *The EMBO Journal*. 1992;  
800 11:4159–4165.
- 801 **Heaphy SM**, Mariotti M, Gladyshev VN, Atkins JF, Baranov PV. Novel ciliate genetic code variants including the  
802 reassignment of all three stop codons to sense codons in *Condylostoma magnum*. *Molecular Biology and*  
803 *Evolution*. 2016; 33:2885–2889. [doi: 10.1093/molbev/msw166](https://doi.org/10.1093/molbev/msw166).
- 804 **Himeno H**, Hasegawa T, Asahara H, Tamura K, Shimizu M. Identity determinants of *E. coli* tryptophan tRNA.  
805 *Nucleic Acids Research*. 1991; 19:6379–6382. [doi: 10.1093/nar/19.23.6379](https://doi.org/10.1093/nar/19.23.6379).
- 806 **Himeno H**, Yoshida S, Soma A, Nishikawa K. Only one nucleotide insertion to the long variable arm confers  
807 an efficient serine acceptor activity upon *Saccharomyces cerevisiae* tRNA(Leu) in vitro. *Journal of Molecular*  
808 *Biology*. 1997; 268:704–711. [doi: 10.1006/jmbi.1997.0991](https://doi.org/10.1006/jmbi.1997.0991).
- 809 **Ivanova NN**, Schwientek P, Tripp HJ, Rinke C, Pati A, Huntemann M, Visel A, Woyke T, Kyrpides NC, Rubin EM.  
810 Stop codon reassignments in the wild. *Science*. 2014; 344:909–913. [doi: 10.1126/science.1250691](https://doi.org/10.1126/science.1250691).

- 811 **Jahn M**, Rogers MJ, Söll D. Anticodon and acceptor stem nucleotides in tRNA(Gln) are major recognition elements  
812 for *E. coli* glutamyl-tRNA synthetase. *Nature*. 1991; 352:258–260. doi: [10.1038/352258a0](https://doi.org/10.1038/352258a0).
- 813 **Jukes TH**, Holmquist R, Moise H. Amino acid composition of proteins: Selection against the genetic code.  
814 *Science*. 1975; 189:50–51. doi: [10.1126/science.237322](https://doi.org/10.1126/science.237322).
- 815 **Jukes TH**. A change in the genetic code in *Mycoplasma capricolum*. *Journal of Molecular Evolution*. 1985;  
816 22:361–362. doi: [10.1007/BF02115692](https://doi.org/10.1007/BF02115692).
- 817 **Karpov SA**, Mikhailov KV, Mirzaeva GS, Mirabdullaev IM, Mamkaeva KA, Titova NN, Aleoshin VV. Obligately  
818 phagotrophic aphelids turned out to branch with the earliest-diverging fungi. *Protist*. 2013; 164:195–205. doi:  
819 [10.1016/j.protis.2012.08.001](https://doi.org/10.1016/j.protis.2012.08.001).
- 820 **Katoh K**, Standley DM. MAFFT multiple sequence alignment software version 7: improvements in performance  
821 and usability. *Molecular Biology and Evolution*. 2013; 30:772–780. doi: [10.1093/molbev/mst010](https://doi.org/10.1093/molbev/mst010).
- 822 **Kawaguchi Y**, Honda H, Taniguchi-Morimura J, Iwasaki S. The codon CUG is read as serine in an asporogenic  
823 yeast *Candida cylindracea*. *Nature*. 1989; 341:164–166. doi: [10.1038/341164a0](https://doi.org/10.1038/341164a0).
- 824 **Keeling PJ**, Doolittle WF. A non-canonical genetic code in an early diverging eukaryotic lineage. *The EMBO*  
825 *Journal*. 1996; 15:2285–2290.
- 826 **Keeling PJ**, Leander BS. Characterisation of a non-canonical genetic code in the oxymonad *Streblospio mitchelli*.  
827 *Journal of Molecular Biology*. 2003; 326:1337–1349. doi: [10.1016/s0022-2836\(03\)00057-3](https://doi.org/10.1016/s0022-2836(03)00057-3).
- 828 **King JL**, Jukes TH. Non-Darwinian evolution. *Science*. 1969; 164:788–798. doi: [10.1126/science.164.3881.788](https://doi.org/10.1126/science.164.3881.788).
- 829 **Knight RD**, Freeland SJ, Landweber LF. Rewiring the keyboard: evolvability of the genetic code. *Nature Reviews*  
830 *Genetics*. 2001; 2:49–58. doi: [10.1038/35047500](https://doi.org/10.1038/35047500).
- 831 **Knight RD**, Freeland SJ, Landweber LF. A simple model based on mutation and selection explains trends in  
832 codon and amino-acid usage and GC composition within and across genomes. *Genome Biology*. 2001;  
833 2:research0010.1–0010.13. doi: [10.1186/gb-2001-2-4-research0010](https://doi.org/10.1186/gb-2001-2-4-research0010).
- 834 **Kollmar M**, Mühlhausen S. Nuclear codon reassignments in the genomics era and mechanisms behind their  
835 evolution. *Bioessays*. 2017; 39. doi: [10.1002/bies.201600221](https://doi.org/10.1002/bies.201600221).
- 836 **Krassowski T**, Coughlan AY, Shen XX, Zhou X, Kominek J, Opulente DA, Riley R, Grigoriev IV, Maheshwari N,  
837 Shields DC, Kurtzman CP, Hittinger CT, Rokas A, Wolfe KH. Evolutionary instability of CUG-Leu in the genetic  
838 code of budding yeasts. *Nature Communications*. 2018; 9:1887. doi: [10.1038/s41467-018-04374-7](https://doi.org/10.1038/s41467-018-04374-7).
- 839 **Massey SE**, Moura G, Beltrão P, Almeida R, Garey JR, Tuite MF, Santos MAS. Comparative evolutionary genomics  
840 unveils the molecular mechanism of reassignment of the CTG codon in *Candida* spp. *Genome Research*. 2003;  
841 13:544–557. doi: [10.1101/gr.811003](https://doi.org/10.1101/gr.811003).
- 842 **McCutcheon JP**, McDonald BR, Moran NA. Origin of an alternative genetic code in the extremely small and GC-  
843 rich genome of a bacterial symbiont. *PLoS Genetics*. 2009; 5:e1000565. doi: [10.1371/journal.pgen.1000565](https://doi.org/10.1371/journal.pgen.1000565).
- 844 **McCutcheon JP**, Moran NA. Functional convergence in reduced genomes of bacterial symbionts spanning 200  
845 My of evolution. *Genome Biology and Evolution*. 2010; 2:708–718. doi: [10.1093/gbe/evq055](https://doi.org/10.1093/gbe/evq055).
- 846 **McCutcheon JP**, Moran NA. Extreme genome reduction in symbiotic bacteria. *Nature Reviews Microbiology*.  
847 2011; 10:13–26. doi: [10.1038/nrmicro2670](https://doi.org/10.1038/nrmicro2670).
- 848 **Meinzel T**, Mechulam Y, Lazennec C, Blanquet S, Fayat G. Critical role of the acceptor stem of tRNAs Met in their  
849 aminoacylation by *Escherichia coli* methionyl-tRNA synthetase. *Journal of Molecular Biology*. 1993; 229:26–36.  
850 doi: [10.1006/jmbi.1993.1005](https://doi.org/10.1006/jmbi.1993.1005).
- 851 **Meyer F**, Schmidt HJ, Plümper E, Hasilik A, Mersmann G, Meyer HE, Engström A, Heckmann K. UGA is translated  
852 as cysteine in pheromone 3 of *Euplotes octocarinatus*. *PNAS*. 1991; 88:3758–3761. doi: [10.1073/pnas.88.9.3758](https://doi.org/10.1073/pnas.88.9.3758).
- 853 **Mühlhausen S**, Findeisen P, Plessmann U, Urlaub H, Kollmar M. A novel nuclear genetic code alteration in  
854 yeasts and the evolution of codon reassignment in eukaryotes. *Genome Research*. 2016; 26:945–955. doi:  
855 [10.1101/gr.200931.115](https://doi.org/10.1101/gr.200931.115).
- 856 **Mühlhausen S**, Kollmar M. Predicting the fungal CUG codon translation with Bagheera. *BMC Genomics*. 2014;  
857 15:411. doi: [10.1186/1471-2164-15-411](https://doi.org/10.1186/1471-2164-15-411).

- 858 **Mühlhausen S**, Schmitt HD, Pan KT, Plessmann U, Urlaub H, Hurst LD, Kollmar M. Endogenous stochastic  
859 decoding of the CUG codon by competing Ser- and Leu-tRNAs in *Ascoidea asiatica*. *Current Biology*. 2018;  
860 28:2046–2057.e5. doi: [10.1016/j.cub.2018.04.085](https://doi.org/10.1016/j.cub.2018.04.085).
- 861 **Mukai T**, Yamaguchi A, Ohtake K, Takahashi M, Hayashi A, Iraha F, Kira S, Yanagisawa T, Yokoyama S, Hoshi H,  
862 Kobayashi T, Sakamoto K. Reassignment of a rare sense codon to a non-canonical amino acid in *Escherichia*  
863 *coli*. *Nucleic Acids Research*. 2015; 43:8111–8122. doi: [10.1093/nar/gkv787](https://doi.org/10.1093/nar/gkv787).
- 864 **Muto A**, Osawa S. The guanine and cytosine content of genomic DNA and bacterial evolution. *PNAS*. 1987;  
865 84:166–169. doi: [10.1073/pnas.84.1.166](https://doi.org/10.1073/pnas.84.1.166).
- 866 **Noutahi E**, Calderon V, Blanchette M, El-Mabrouk N, Lang BF. Rapid genetic code evolution in green algal  
867 mitochondrial genomes. *Molecular Biology and Evolution*. 2019; 36:766–783. doi: [10.1093/molbev/msz016](https://doi.org/10.1093/molbev/msz016).
- 868 **Noutahi E**, Calderon V, Blanchette M, Lang BF, El-Mabrouk N. CoreTracker: accurate codon reassignment  
869 prediction, applied to mitochondrial genomes. *Bioinformatics*. 2017; 33:3331–3339. doi: [10.1093/bioinformatics/btx421](https://doi.org/10.1093/bioinformatics/btx421).
- 870
- 871 **Oba T**, Andachi Y, Muto A, Osawa S. CGG: an unassigned or nonsense codon in *Mycoplasma capricolum*. *PNAS*.  
872 1991; 88:921–925. doi: [10.1073/pnas.88.3.921](https://doi.org/10.1073/pnas.88.3.921).
- 873 **Osawa S**, Jukes TH. Codon reassignment (codon capture) in evolution. *Journal of Molecular Evolution*. 1989;  
874 28:271–278. doi: [10.1007/BF02103422](https://doi.org/10.1007/BF02103422).
- 875 **Parks DH**, Chuvochina M, Chaumeil PA, Rinke C, Mussig AJ, Hugenholtz P. A complete domain-to-species  
876 taxonomy for Bacteria and Archaea. *Nature Biotechnology*. 2020; 38:1079–1086. doi: [10.1038/s41587-020-](https://doi.org/10.1038/s41587-020-0501-8)  
877 [0501-8](https://doi.org/10.1038/s41587-020-0501-8).
- 878 **Parks DH**, Rinke C, Chuvochina M, Chaumeil PA, Woodcroft BJ, Evans PN, Hugenholtz P, Tyson GW. Recovery of  
879 nearly 8,000 metagenome-assembled genomes substantially expands the tree of life. *Nature Microbiology*.  
880 2017; 2:1533–1542. doi: [10.1038/s41564-017-0012-7](https://doi.org/10.1038/s41564-017-0012-7).
- 881 **Rafels-Ybern À**, Torres AG, Camacho N, Herencia-Ropero A, Roura Frigolé H, Wulff TF, Raboteg M, Bordons  
882 A, Grau-Bové X, Ruiz-Trillo I, Ribas de Pouplana L. The expansion of inosine at the wobble position of  
883 tRNAs, and its role in the evolution of proteomes. *Molecular Biology and Evolution*. 2018; 36:650–662. doi:  
884 [10.1093/molbev/msy245](https://doi.org/10.1093/molbev/msy245).
- 885 **Riley R**, Haridas S, Wolfe KH, Lopes MR, Hittinger CT, Göker M, Salamov AA, Wisecaver JH, Long TM, Calvey CH,  
886 Aerts AL, Barry KW, Choi C, Clum A, Coughlan AY, Deshpande S, Douglass AP, Hanson SJ, Klenk HP, LaButti  
887 KM, et al. Comparative genomics of biotechnologically important yeasts. *PNAS*. 2016; 113:9882–9887. doi:  
888 [10.1073/pnas.1603941113](https://doi.org/10.1073/pnas.1603941113).
- 889 **Rinke C**, Schwientek P, Sczyrba A, Ivanova NN, Anderson IJ, Cheng JF, Darling AE, Malfatti S, Swan BK, Gies Ea,  
890 Dodsworth Ja, Hedlund BP, Tsiamis G, Sievert SM, Liu WT, Eisen Ja, Hallam SJ, Kyrpidis NC, Stepanauskas R,  
891 Rubin EM, et al. Insights into the phylogeny and coding potential of microbial dark matter. *Nature*. 2013;  
892 499:431–437. doi: [10.1038/nature12352](https://doi.org/10.1038/nature12352).
- 893 **Sakamoto K**, Kawai G, Niimi T, Satoh T, Sekine M, Yamaizumi Z, Nishimura S, Miyazawa T, Yokoyama S. A  
894 modified uridine in the first position of the anticodon of a minor species of arginine tRNA, the argU gene  
895 product, from *Escherichia coli*. *European Journal of Biochemistry*. 1993; 216:369–375. doi: [10.1111/j.1432-](https://doi.org/10.1111/j.1432-1033.1993.tb18154.x)  
896 [1033.1993.tb18154.x](https://doi.org/10.1111/j.1432-1033.1993.tb18154.x).
- 897 **Salem H**, Bauer E, Kirsch R, Berasategui A, Cripps M, Weiss B, Koga R, Fukumori K, Vogel H, Fukatsu T, Kaltenpoth  
898 M. Drastic genome reduction in an herbivore's pectinolytic symbiont. *Cell*. 2017; 171:1520–1531.e13. doi:  
899 [10.1016/j.cell.2017.10.029](https://doi.org/10.1016/j.cell.2017.10.029).
- 900 **Schneider SU**, Leible MB, Yang XP. Strong homology between the small subunit of ribulose-1,5-bisphosphate  
901 carboxylase/oxygenase of two species of *Acetabularia* and the occurrence of unusual codon usage. *Molecular*  
902 *Genetics and Genomics*. 1989; 218:445–452. doi: [10.1007/BF00332408](https://doi.org/10.1007/BF00332408).
- 903 **Schulman LH**, Pelka H. Anticodon loop size and sequence requirements for recognition of formylmethionine  
904 tRNA by methionyl-tRNA synthetase. *PNAS*. 1983; 80:6755–6759. doi: [10.1073/pnas.80.22.6755](https://doi.org/10.1073/pnas.80.22.6755).
- 905 **Schultz DW**, Yarus M. Transfer RNA mutation and the malleability of the genetic code. *Journal of Molecular*  
906 *Biology*. 1994; 235:1377–1380. doi: [10.1006/jmbi.1994.1094](https://doi.org/10.1006/jmbi.1994.1094).



- 907 **Sengupta S**, Higgs PG. A unified model of codon reassignment in alternative genetic codes. *Genetics*. 2005;  
908 170:831–840. doi: [10.1534/genetics.104.037887](https://doi.org/10.1534/genetics.104.037887).
- 909 **Shackelton LA**, Holmes EC. The role of alternative genetic codes in viral evolution and emergence. *Journal of*  
910 *Theoretical Biology*. 2008; 254:128–134. doi: [10.1016/j.jtbi.2008.05.024](https://doi.org/10.1016/j.jtbi.2008.05.024).
- 911 **Shen XX**, Opulente DA, Kominek J, Zhou X, Steenwyk JL, Buh KV, Haase MAB, Wisecaver JH, Wang M, Doering  
912 DT, Boudouris JT, Schneider RM, Langdon QK, Ohkuma M, Endoh R, Takashima M, Manabe RI, Čadež N,  
913 Libkind D, Rosa CA, et al. Tempo and mode of genome evolution in the budding yeast subphylum. *Cell*. 2018;  
914 175:1533–1545.e20. doi: [10.1016/j.cell.2018.10.023](https://doi.org/10.1016/j.cell.2018.10.023).
- 915 **Singer GA**, Hickey DA. Nucleotide bias causes a genomewide bias in the amino acid composition of proteins.  
916 *Molecular Biology and Evolution*. 2000; 17:1581–1588. doi: [10.1093/oxfordjournals.molbev.a026257](https://doi.org/10.1093/oxfordjournals.molbev.a026257).
- 917 **Soma A**, Kumagai R, Nishikawa K, Himeno H. The anticodon loop is a major identity determinant of *Saccha-*  
918 *romyces cerevisiae* tRNA<sup>Leu</sup>. *Journal of Molecular Biology*. 1996; 263:707–714. doi: [10.1006/jmbi.1996.0610](https://doi.org/10.1006/jmbi.1996.0610).
- 919 **Spanjaard RA**, Chen K, Walker JR, van Duijn J. Frameshift suppression at tandem AGA and AGG codons by cloned  
920 tRNA genes: assigning a codon to argU tRNA and T4 tRNA(Arg). *Nucleic Acids Research*. 1990; 18:5031–5036.  
921 doi: [10.1093/nar/18.17.5031](https://doi.org/10.1093/nar/18.17.5031).
- 922 **Sprinzl M**, Horn C, Brown M, Ioudovitch A, Steinberg S. Compilation of tRNA sequences and sequences of tRNA  
923 genes. *Nucleic Acids Research*. 1998; 26:148–153. doi: [10.1093/nar/26.1.148](https://doi.org/10.1093/nar/26.1.148).
- 924 **Steenwyk JL**, Opulente DA, Kominek J, Shen XX, Zhou X, Labella AL, Bradley NP, Eichman BF, Čadež N, Libkind D,  
925 DeVirgilio J, Hulfachor AB, Kurtzman CP, Hittinger CT, Rokas A. Extensive loss of cell-cycle and DNA repair genes  
926 in an ancient lineage of bipolar budding yeasts. *PLoS Biology*. 2019; 17:e3000255. doi: [10.1093/gbe/evw254](https://doi.org/10.1093/gbe/evw254).
- 927 **Sueoka N**. Correlation between base composition of deoxyribonucleic acid and amino acid composition of  
928 protein. *PNAS*. 1961; 47:1141–1149. doi: [10.1073/pnas.47.8.1141](https://doi.org/10.1073/pnas.47.8.1141).
- 929 **Suzuki T**, Ueda T, Watanabe K. The ‘polysemous’ codon—a codon with multiple amino acid assignment caused  
930 by dual specificity of tRNA identity. *The EMBO Journal*. 1997; 16:1122–1134. doi: [10.1093/emboj/16.5.1122](https://doi.org/10.1093/emboj/16.5.1122).
- 931 **Swart EC**, Serra V, Petroni G, Nowacki M. Genetic codes with no dedicated stop codon: Context-dependent  
932 translation termination. *Cell*. 2016; 166:691–702. doi: [10.1093/bioinformatics/btx421](https://doi.org/10.1093/bioinformatics/btx421).
- 933 **Varshney U**, Lee CP, RajBhandary UL. Direct analysis of aminoacylation levels of tRNAs in vivo. Application to  
934 studying recognition of *Escherichia coli* initiator tRNA mutants by glutamyl-tRNA synthetase. *Journal of*  
935 *Biological Chemistry*. 1991; 266:24712–24718.
- 936 **Volokhov DV**, Neverov AA, George J, Kong H, Liu SX, Anderson C, Davidson MK, Chizhikov V. Genetic analysis of  
937 housekeeping genes of members of the genus *Acholeplasma*: phylogeny and complementary molecular mark-  
938 ers to the 16S rRNA gene. *Molecular Phylogenetics and Evolution*. 2007; 44:699–710. doi: [10.1038/314185a0](https://doi.org/10.1038/314185a0).
- 939 **Waterhouse RM**, Seppey M, Simão FA, Manni M, Ioannidis P, Klioutchnikov G, Kriventseva EV, Zdobnov EM.  
940 BUSCO applications from quality assessments to gene prediction and phylogenomics. *Molecular Biology and*  
941 *Evolution*. 2018; 35:543–548. doi: [10.1093/molbev/msx319](https://doi.org/10.1093/molbev/msx319).
- 942 **Yamao F**, Muto A, Kawauchi Y, Iwami M, Iwagami S, Azumi Y, Osawa S. UGA is read as tryptophan in *Mycoplasma*  
943 *capricolum*. *PNAS*. 1985; 82:2306–2309. doi: [10.1073/pnas.82.8.2306](https://doi.org/10.1073/pnas.82.8.2306).
- 944 **Záhonová K**, Kostygov AY, Ševčíková T, Yurchenko V, Eliáš M. An unprecedented non-canonical nuclear genetic  
945 code with all three termination codons reassigned as sense codons. *Current Biology*. 2016; 26:2364–2369.  
946 doi: [10.1016/j.cub.2016.06.064](https://doi.org/10.1016/j.cub.2016.06.064).
- 947 **Žihala D**, Eliáš M. Evolution and unprecedented variants of the mitochondrial genetic code in a lineage of green  
948 algae. *Genome Biology and Evolution*. 2019; 11:2992–3007. doi: [10.1093/gbe/evz210](https://doi.org/10.1093/gbe/evz210).

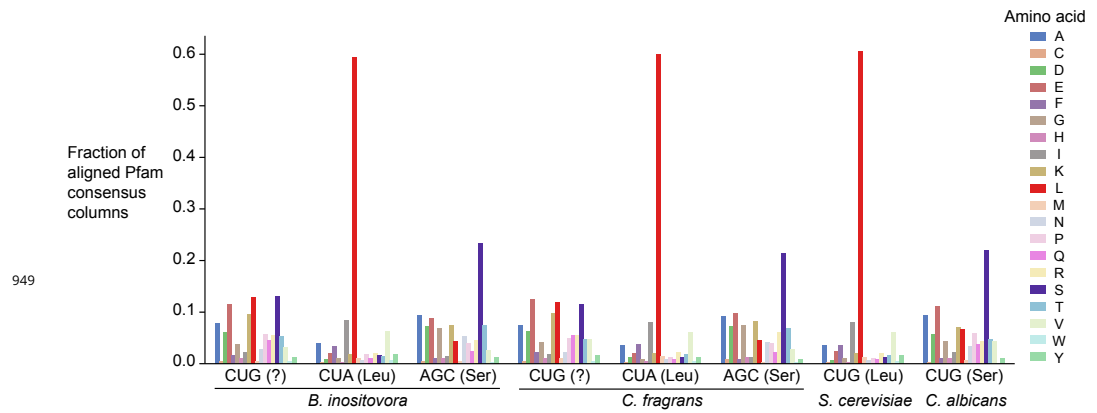

**Figure 2-Figure supplement 1.** Distribution of the highest probability amino acid for all aligned Pfam consensus columns to CUG, CUA (rare leucine codon), and AGC (rare serine codon) in *B. inositovora* and *C. fragrans* and to CUG in *S. cerevisiae* and *C. albicans*. Codetta codon inference is labelled in parentheses.

**Figure 4-Figure supplement 1.** (A) GTDB phylogenetic tree of *Peptacetobacter* (Clostridium\_U in GTDB) and closest outgroup genomes. Species numbers can be cross-referenced with **Figure 4-source data 1**. We consider the entire Clostridium\_U clade to have reassigned CGG to glutamine due to the presence of an almost identical CGG-decoding tRNA<sub>CGG</sub> in all four species. Asterisks indicate genomes with GTDB CheckM estimated genome completeness >99%. For each species, the Codetta CGG inference is indicated by colored circles (red: arginine, light blue: glutamine, white: '?'). The presence of tRNA genes that recognize the CAR- and CGN-codons is indicated by filled circles, colored according to the predicted amino acid charging based on identity elements for tRNAs (see Methods). A gray box outlines the inability to locate any CGG-decoding tRNAs in the Peptostreptococcaceae (species #5-34). The lines connecting codons and tRNA anticodons represent the likely wobble decoding capabilities, with dashed lines representing weaker interactions. The anticodon ACG is presumed to be modified to ICG, and the U34 of UCG is presumed to be modified in a way that restricts wobble to CGA and CGG, but could potentially recognize CGU and/or CGC depending on the true modification state. Codon usage is the frequency per 10,000 codons aligned to Pfam domains. (B) Multiple sequence alignments of transcription termination factor NusA (BUSCO POG091H0124) and SsrA-binding protein (BUSCO POG091H022D) from the Clostridium\_U clade and selected outgroup species. Alignment regions containing nearby CGG ( $\alpha$ ) positions are shown, with columns with CGG in Clostridium\_U sequences highlighted. (C) The CGG-decoding tRNA<sub>CGG</sub> from species #1 (*Peptacetobacter hiranonis* DSM 13275, GCA\_000156055.1). tRNA sequence features involved in glutamine identity are highlighted (Jahn et al., 1991; Hayase et al., 1992), with nucleotide numbering following the convention of Sprinzl et al. (1998). Nucleotides highlighted in gray do not match the expected identity element.

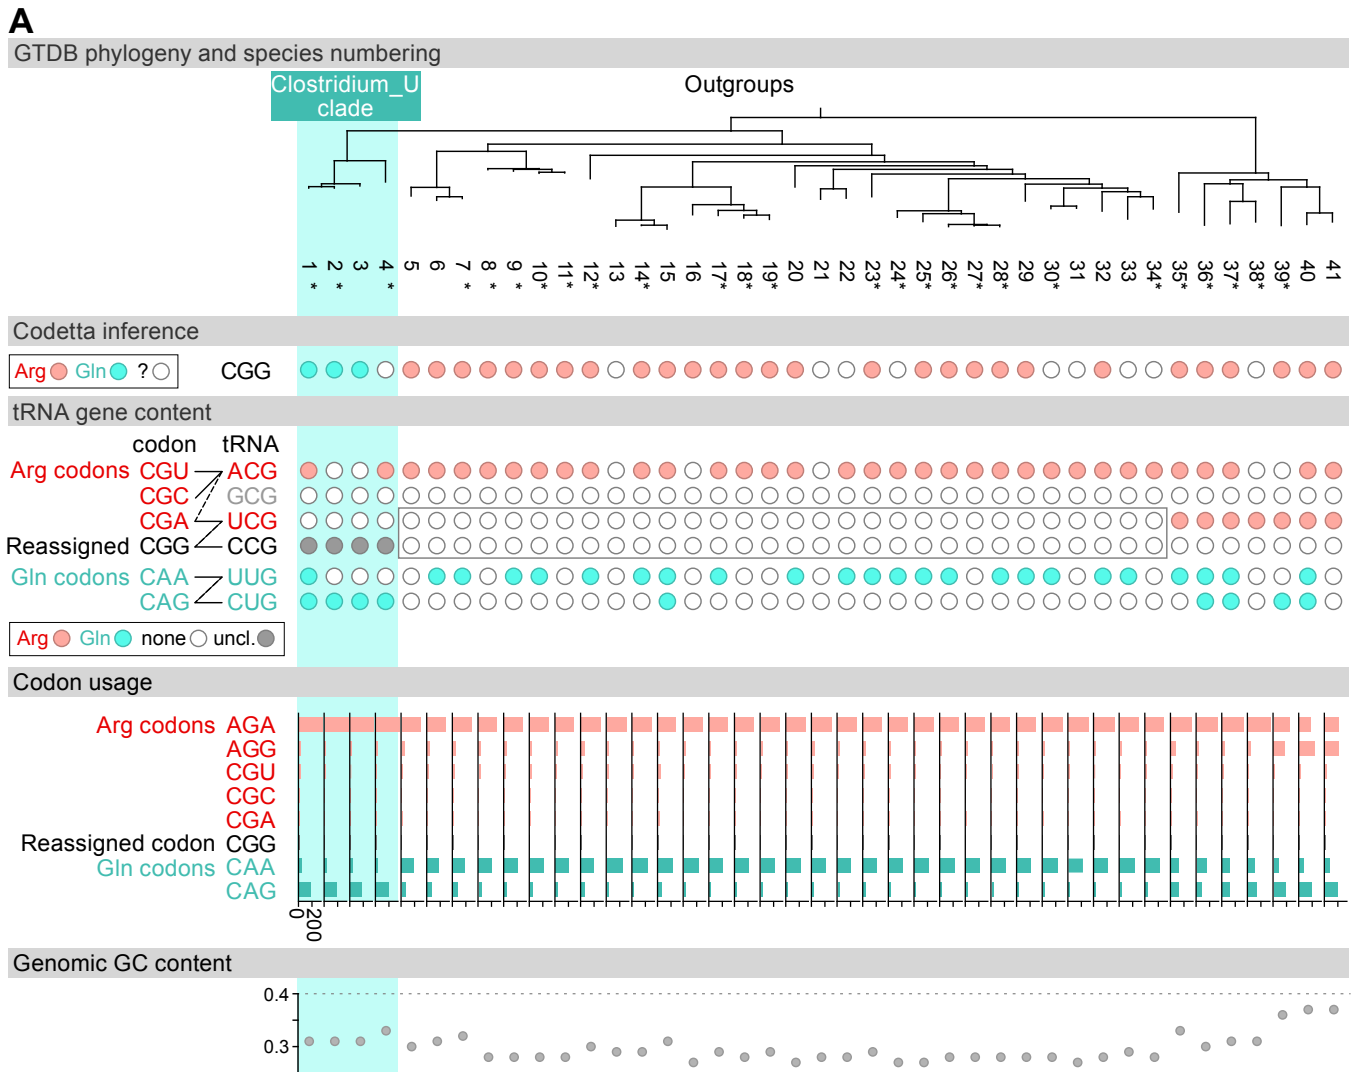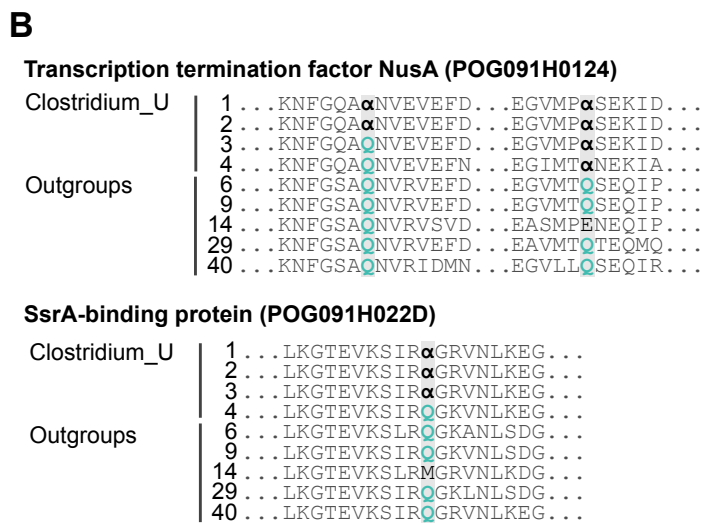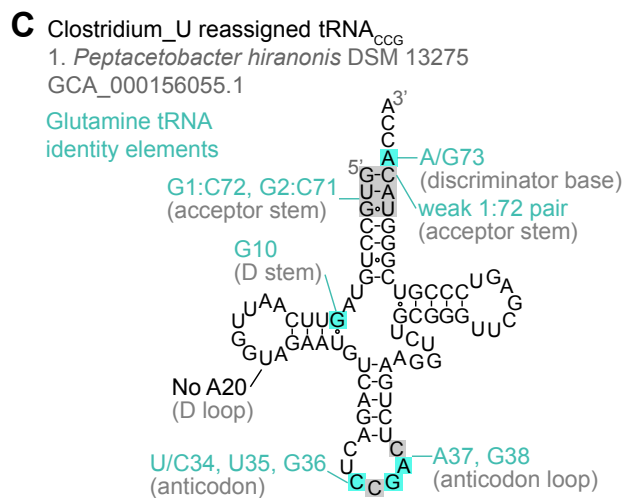

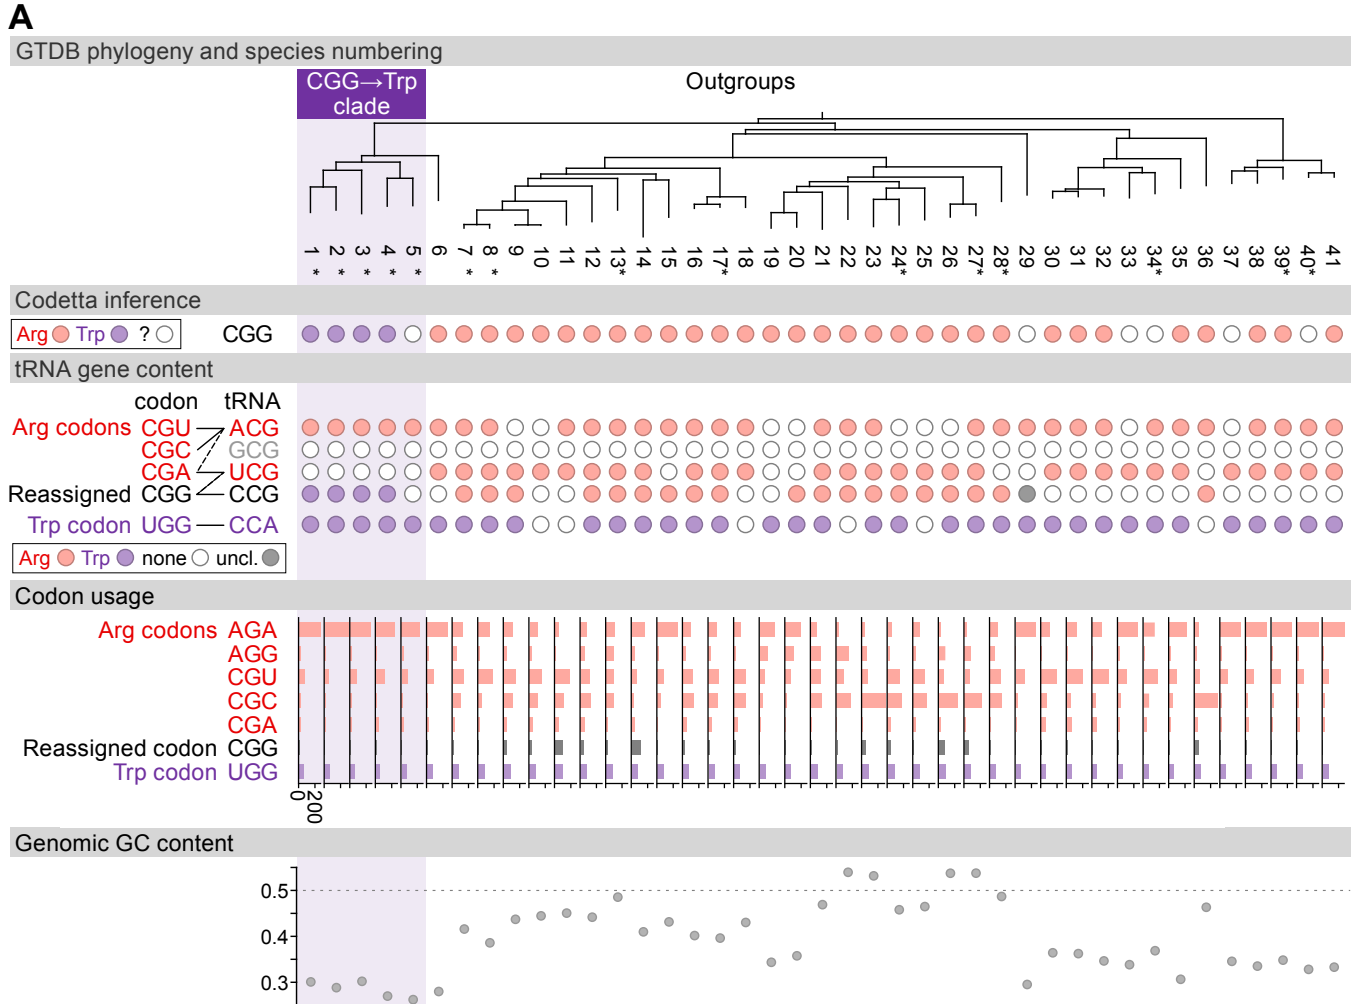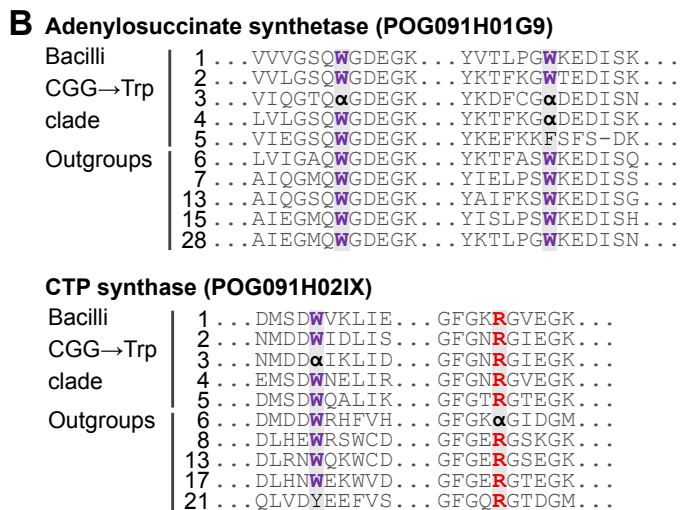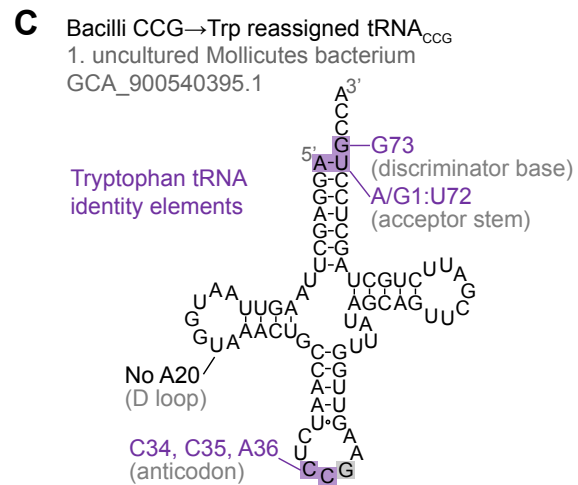

**Figure 4–Figure supplement 2.** (A) GTDB phylogenetic tree of the Bacilli CGG→Trp clade and closest outgroup genomes. Species numbers can be cross-referenced with **Figure 4–source data 1**. We consider species #5 to be part of the reassigned clade due to the tree topology. Asterisks indicate genomes with GTDB CheckM estimated genome completeness >95%. For each species, the Codetta CGG inference is indicated by colored circles (red: arginine, purple: tryptophan, white: uninferred). The presence of tRNA genes that recognize the UGG and CGN-codons is indicated by filled circles, colored according to the predicted amino acid charging based on identity elements for tRNAs (see Methods). The lines connecting codons and tRNA anticodons represent the likely wobble decoding capabilities, with dashed lines representing weaker interactions. The anticodon ACG is presumed to be modified to ICG. The U34 of anticodon UCG is presumed to be modified in a way that restricts decoding to CGA and CGG, but could potentially recognize CGU and/or CGC depending on the true modification state. Codon usage is the frequency per 10,000 codons aligned to Pfam domains. (B) Multiple sequence alignments of adenylosuccinate synthetase (BUSCO POG091H01G9) and CTP synthase (BUSCO POG091H02IX) from the Bacilli CGG→Trp clade and selected outgroup species. Alignment regions containing CGG ( $\alpha$ ) at conserved positions are shown, with columns with CGG in Bacilli CGG→Trp clade and the closest outgroup (species #6) sequences highlighted. (C) The CGG-decoding tRNA<sub>CCG</sub> from species #1 (uncultured Mollicutes bacterium, GCA\_900540395.1). tRNA sequence features involved in tryptophan identity are highlighted (*Giegé et al., 1998; Himeno et al., 1991*), with nucleotide numbering following the convention of *Sprinzi et al. (1998)*. Nucleotides highlighted in gray do not match the expected identity element.

951



## A

### GTDB phylogeny and species numbering

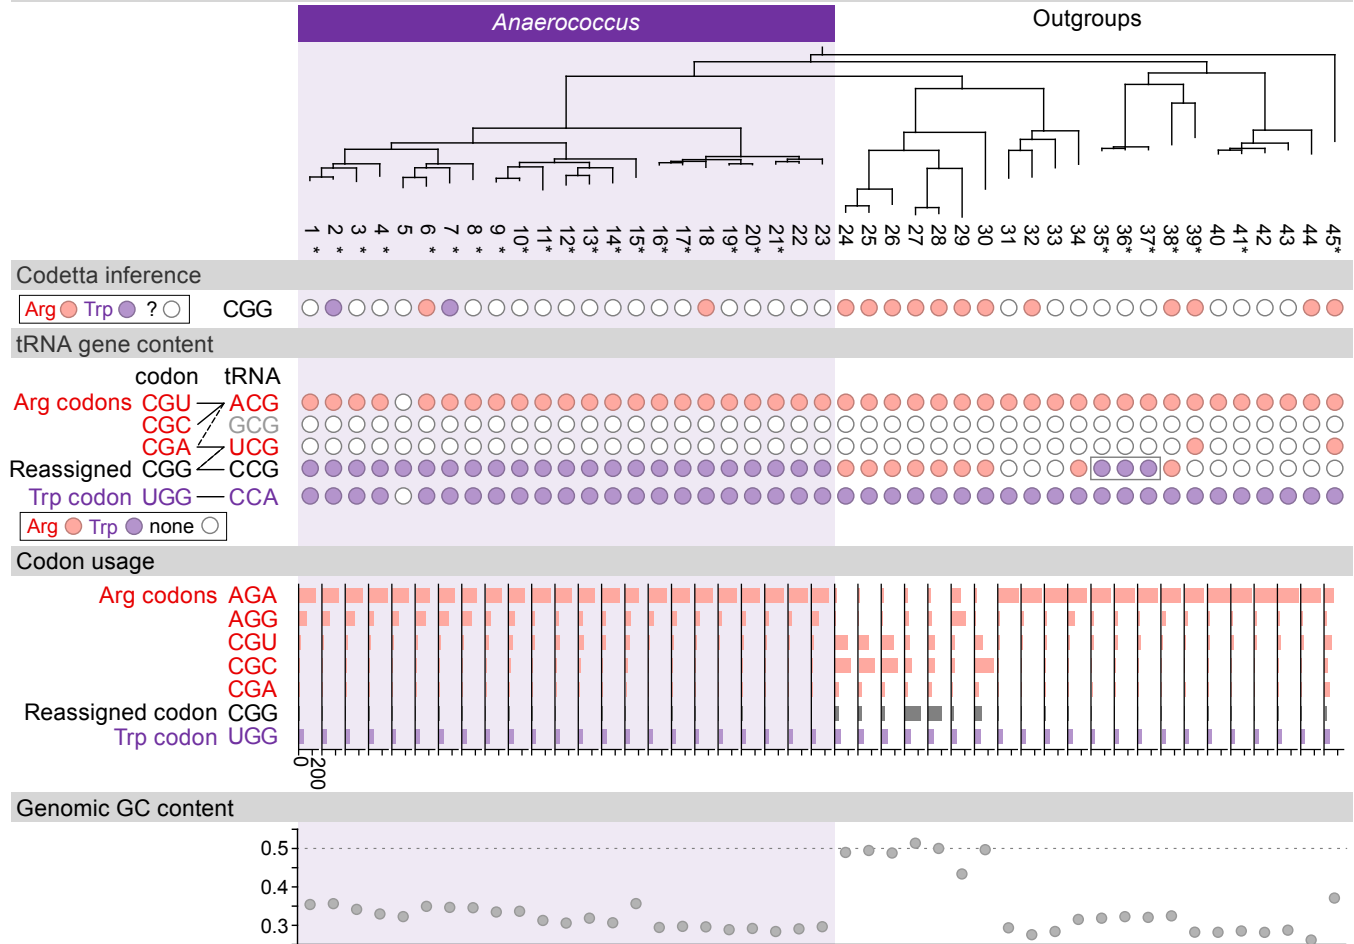

## B DNA ligase (POG091H024G)

|                     |    |                                        |
|---------------------|----|----------------------------------------|
| <i>Anaerococcus</i> | 1  | ..KFEAEEYTTTLREVVWNVGRSGKVTPSAILDP...  |
|                     | 3  | ..KFEAEEYTTTLRKVVWNVGRTGKVTPSAILDP...  |
|                     | 4  | ..KYEAEFTTTTLKEVVWNVGRTGKVTPSAILEP...  |
|                     | 5  | ..KFEPEEFTTKLIDVVWNVGRTGKVTPSAILEP...  |
|                     | 11 | ..KFEAEEYTTTLLDVVWNVGRTGKVTPSAILEP...  |
|                     | 14 | ..KFEAEEYTTTLLDVVWNVGRTGKVTPSALLEP...  |
|                     | 15 | ..KFEAEEYTTTLLDVVWNVGRTGKVTPSAILEP...  |
|                     | 21 | ..KYDPEEYTTTKLIDVVWNVGRTGKVTPSAILEP... |
| <i>Outgroups</i>    | 27 | ..KFEAEEVTTTLQAVEWNVGRTGKVTPIALLDP...  |
|                     | 30 | ..KFEAEEVTTTLQAVEWNVGRTGKVTPTAQLDP...  |
|                     | 39 | ..KFEPEEVTTTLKEVIWNVGRTGKVTPTAILEP...  |
|                     | 41 | ..KFEAEEYSTILKEVVWNVGRTGKVTPTAILEP...  |

## C *Anaerococcus* reassigned tRNA<sub>CCG</sub> 7. *Anaerococcus* sp. Marseille-P3915 GCA\_900258475.1

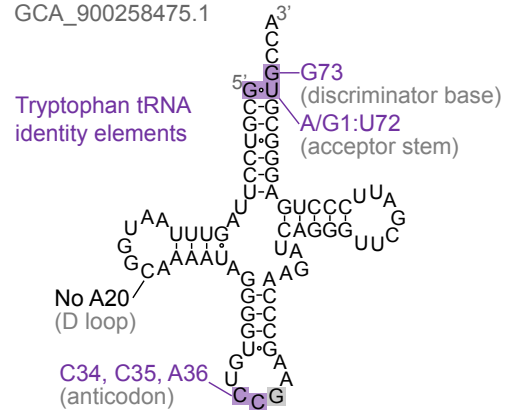

**Figure 4–Figure supplement 3.** (A) GTDB phylogenetic tree of *Anaerococcus* and closest outgroup genomes. Species numbers can be cross-referenced with **Figure 4–source data 1**. We considered the entire *Anaerococcus* clade to have reassigned CGG to tryptophan due to the presence of a tryptophan-like tRNA<sub>CCG</sub> in all *Anaerococcus* species. Asterisks indicate genomes with GTDB CheckM estimated genome completeness >98%. For each species, the translation of the reassigned codon CGG inferred by Codetta is indicated by colored circles (red: arginine, purple: tryptophan, white: '?'). The presence of tRNA genes that recognize the UGG and CGN-codons is also indicated by filled circles, colored according to the predicted amino acid charging based on identity elements for tRNAs (see Methods). A gray box outlines the tRNA<sub>CCG</sub> in *Fingoldia*, which has features of tryptophan identity. The lines connecting codons and tRNA anticodons represent the likely wobble decoding capabilities, with dashed lines representing weaker interactions. The anticodon ACG is presumed to be modified to ICG. The U34 of anticodon UCG is presumed to be modified in a way that restricts decoding to CGA and CGG, but could potentially recognize CGU and/or CGC depending on the true modification state. Codon usage is the frequency per 10,000 codons aligned to Pfam domains. (B) Region of a multiple sequence alignment of DNA ligase (BUSCO POG091H024G) from *Anaerococcus* species and selected outgroup species, containing a CGG ( $\alpha$ ) at a conserved position in a single *Anaerococcus* species. (C) The CGG-decoding tRNA<sub>CCG</sub> from species #7 (*Anaerococcus* sp. Marseille-P3915, GCA\_900258475.1). tRNA sequence features involved in tryptophan identity are highlighted (Giegé *et al.*, 1998; Himeno *et al.*, 1991), with nucleotide numbering following the convention of Sprinzl *et al.* (1998). Nucleotides highlighted in gray do not match the expected identity element.

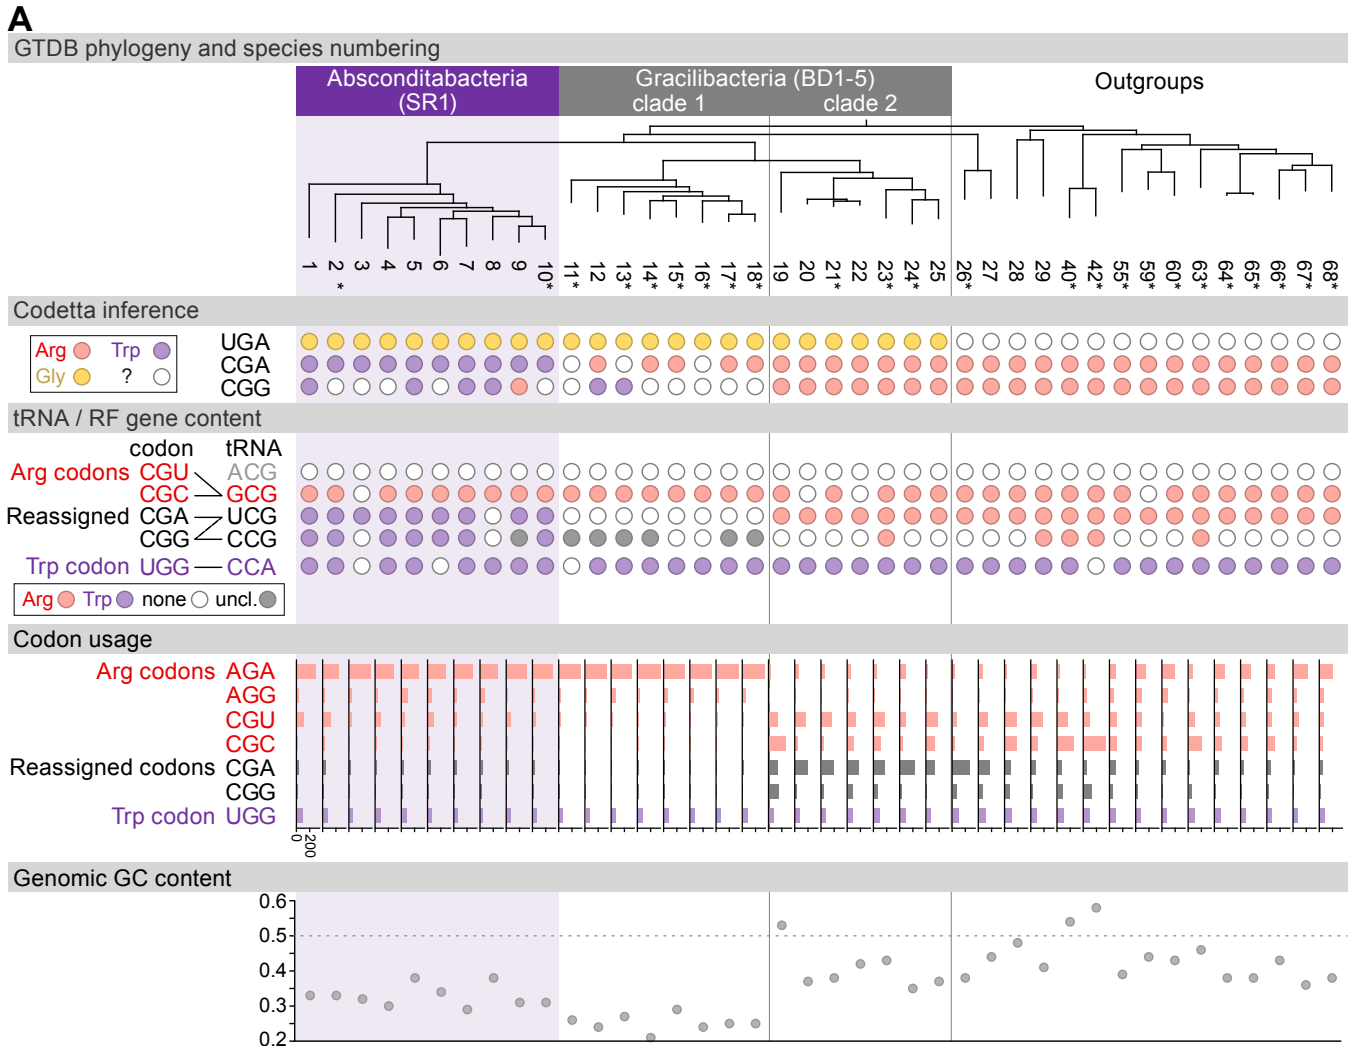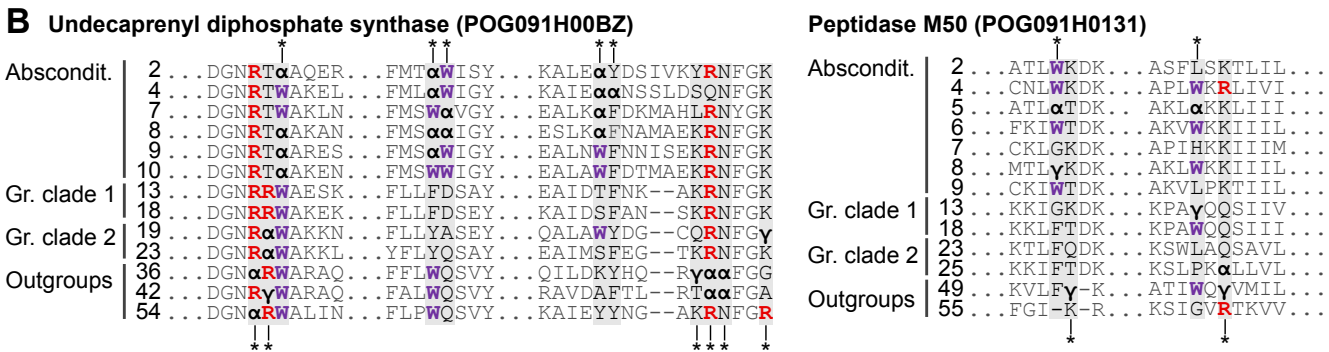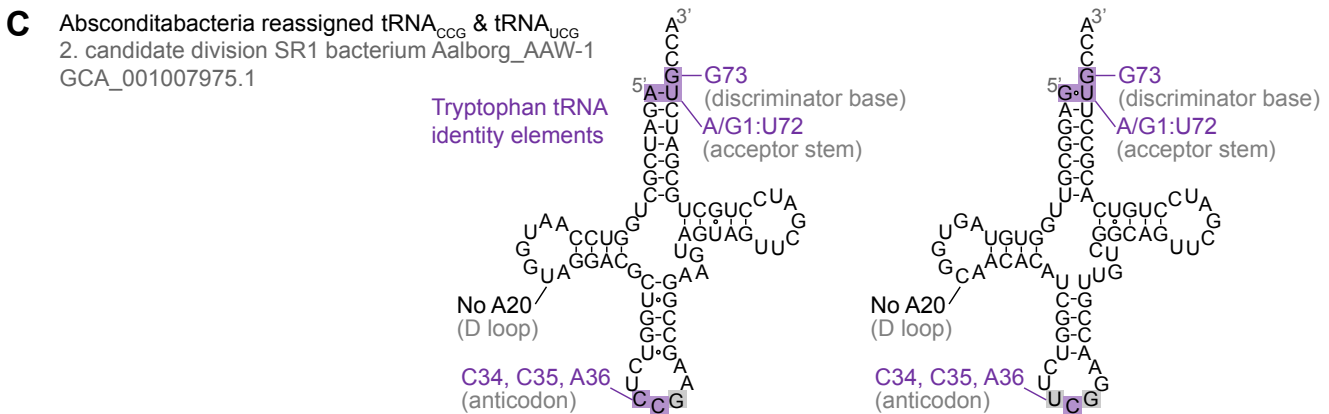

**Figure 4–Figure supplement 4.** (A) GTDB phylogenetic tree of Absconditabacteria, Gracilibacteria, and closest outgroup genomes. Species numbers can be cross-referenced with **Figure 4–source data 1**. We considered the entire Absconditabacteria clade to have reassigned CGA and CGG to tryptophan due to a combination of Codetta inference, phylogeny, and evidence from tRNA genes and multiple sequence alignments of BUSCO genes. We provisionally split the Gracilibacteria into two clades based on differences in Codetta CGG inference, tRNA gene content, codon usage, and GC content. Gracilibacteria clade 1 may have reassigned CGG to tryptophan, pending additional evidence. Asterisks indicate genomes with GTDB CheckM estimated genome completeness >75%. For each species, the Codetta inference of the three reassigned codons (UGA, CGA, and CGG) is indicated by colored circles (red: arginine, purple: tryptophan, yellow: glycine, white: '?'). The presence of tRNA genes that recognize UGG and CGN-codons is indicated by filled circles, colored according to the predicted amino acid charging based on identity elements for tRNAs (see Methods). The lines connecting codons and tRNA anticodons represent the likely wobble decoding capabilities, with dashed lines representing weaker interactions. The U34 of UCG is presumed to be modified in a way that restricts wobble to CGA and CGG, but could potentially recognize CGU and/or CGC depending on the true modification state. Codon usage is the frequency per 10,000 codons aligned to Pfam domains. (B) Multiple sequence alignments of undecaprenyl diphosphate synthase (BUSCO POG091H00BZ) and Peptidase M50 (BUSCO POG091H0131) from Absconditabacteria, Gracilibacteria clades 1 and 2, and selected outgroup species. Alignment regions containing nearby CGA ( $\alpha$ ) or CGG ( $\gamma$ ) positions are shown, with columns containing CGA or CGG in Absconditabacteria or Gracilibacteria clade 1 sequences highlighted with an asterisk above, and columns containing CGA or CGG in Gracilibacteria clade 2 and outgroup sequences highlighted with an asterisk below. (C) The CGA- and CGG-decoding tRNAs (UCG and CCG anticodons) from species #2 (candidate division SR1 bacterium Aalborg\_AAW-1, GCA\_001007975.1). tRNA sequence features involved in tryptophan identity are highlighted (*Giegé et al., 1998; Himeno et al., 1991*), with nucleotide numbering following the convention of *Sprinzi et al. (1998)*. Nucleotides highlighted in gray do not match the expected identity element.
